# Supplementary material for: Prevalence and incidence of dry eye in the USA: a systematic review protocol
Source: PubMed Central journal article supplement — BMJ Open. 2021 Nov 23;11(11):e056203. doi: 10.1136/bmjopen-2021-056203 (PMC8611449; doi:10.1136/bmjopen-2021-056203), 2021-11-23
Supplement: bmjopen-2021-056203.draft_revisions.pdf [file bmjopen-2021-056203.draft_revisions.pdf]

# BMJ Open

BMJ Open is committed to open peer review. As part of this commitment we make the peer review history of every article we publish publicly available.

When an article is published we post the peer reviewers' comments and the authors' responses online. We also post the versions of the paper that were used during peer review. These are the versions that the peer review comments apply to.

The versions of the paper that follow are the versions that were submitted during the peer review process. They are not the versions of record or the final published versions. They should not be cited or distributed as the published version of this manuscript.

BMJ Open is an open access journal and the full, final, typeset and author-corrected version of record of the manuscript is available on our site with no access controls, subscription charges or pay-per-view fees (<http://bmjopen.bmj.com>).

If you have any questions on BMJ Open's open peer review process please email [info.bmjopen@bmj.com](mailto:info.bmjopen@bmj.com)

# BMJ Open

## Prevalence and incidence of dry eye in the United States: a systematic review protocol

|                               |                                                                                                                                                                                                                                                                                                                                                                                                                                                                                                                                                                                                                                                                                                                                                                                                                                                                                                                                                              |
|-------------------------------|--------------------------------------------------------------------------------------------------------------------------------------------------------------------------------------------------------------------------------------------------------------------------------------------------------------------------------------------------------------------------------------------------------------------------------------------------------------------------------------------------------------------------------------------------------------------------------------------------------------------------------------------------------------------------------------------------------------------------------------------------------------------------------------------------------------------------------------------------------------------------------------------------------------------------------------------------------------|
| Journal:                      | <i>BMJ Open</i>                                                                                                                                                                                                                                                                                                                                                                                                                                                                                                                                                                                                                                                                                                                                                                                                                                                                                                                                              |
| Manuscript ID                 | bmjopen-2021-056203                                                                                                                                                                                                                                                                                                                                                                                                                                                                                                                                                                                                                                                                                                                                                                                                                                                                                                                                          |
| Article Type:                 | Protocol                                                                                                                                                                                                                                                                                                                                                                                                                                                                                                                                                                                                                                                                                                                                                                                                                                                                                                                                                     |
| Date Submitted by the Author: | 05-Aug-2021                                                                                                                                                                                                                                                                                                                                                                                                                                                                                                                                                                                                                                                                                                                                                                                                                                                                                                                                                  |
| Complete List of Authors:     | McCann, Paul; University of Colorado - Anschutz Medical Campus, Department of Ophthalmology<br>Abraham, Alison; University of Colorado School of Public Health Department of Biostatistics & Informatics, Department of Epidemiology, Colorado School of Public Health, and Department of Ophthalmology, School of Medicine<br>Gregory, Darren G.; University of Colorado - Anschutz Medical Campus, Department of Ophthalmology<br>Hauswirth, Scott; University of Colorado Denver - Anschutz Medical Campus, Department of Ophthalmology<br>Ifantides, Cristos; University of Colorado Denver - Anschutz Medical Campus, Department of Ophthalmology<br>Liu, Su-Hsun; University of Colorado Denver - Anschutz Medical Campus, Department of Ophthalmology<br>Saldanha, Ian; Brown University School of Public Health, Health Services, Policy and Practice<br>Li, Tianjing; University of Colorado - Anschutz Medical Campus, Department of Ophthalmology |
| Keywords:                     | Corneal and external diseases < OPHTHALMOLOGY, EPIDEMIOLOGY, PUBLIC HEALTH                                                                                                                                                                                                                                                                                                                                                                                                                                                                                                                                                                                                                                                                                                                                                                                                                                                                                   |
|                               |                                                                                                                                                                                                                                                                                                                                                                                                                                                                                                                                                                                                                                                                                                                                                                                                                                                                                                                                                              |

SCHOLARONE™  
Manuscripts

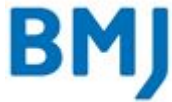

I, the Submitting Author has the right to grant and does grant on behalf of all authors of the Work (as defined in the below author licence), an exclusive licence and/or a non-exclusive licence for contributions from authors who are: i) UK Crown employees; ii) where BMJ has agreed a CC-BY licence shall apply, and/or iii) in accordance with the terms applicable for US Federal Government officers or employees acting as part of their official duties; on a worldwide, perpetual, irrevocable, royalty-free basis to BMJ Publishing Group Ltd ("BMJ") its licensees and where the relevant Journal is co-owned by BMJ to the co-owners of the Journal, to publish the Work in this journal and any other BMJ products and to exploit all rights, as set out in our [licence](#).

The Submitting Author accepts and understands that any supply made under these terms is made by BMJ to the Submitting Author unless you are acting as an employee on behalf of your employer or a postgraduate student of an affiliated institution which is paying any applicable article publishing charge ("APC") for Open Access articles. Where the Submitting Author wishes to make the Work available on an Open Access basis (and intends to pay the relevant APC), the terms of reuse of such Open Access shall be governed by a Creative Commons licence – details of these licences and which [Creative Commons](#) licence will apply to this Work are set out in our licence referred to above.

Other than as permitted in any relevant BMJ Author's Self Archiving Policies, I confirm this Work has not been accepted for publication elsewhere, is not being considered for publication elsewhere and does not duplicate material already published. I confirm all authors consent to publication of this Work and authorise the granting of this licence.

1 **Title:** Prevalence and incidence of dry eye in the United States: a systematic review protocol

2 **Authors:** Paul McCann<sup>1</sup>, Alison G. Abraham<sup>1,2</sup>, Darren G. Gregory<sup>1</sup>, Scott Hauswirth<sup>1</sup>, Cristos  
3 Ifantides<sup>1</sup>, Su-Hsun Liu<sup>1</sup>, Ian J. Saldanha<sup>3,4</sup>, Tianjing Li<sup>1,2</sup>

4 <sup>1</sup>Department of Ophthalmology, School of Medicine, University of Colorado Anschutz  
5 Medical Campus, Colorado, USA

6 <sup>2</sup>Department of Epidemiology, Colorado School of Public Health, Colorado, USA

7 <sup>3</sup>Center for Evidence Synthesis in Health, Department of Health Services, Policy, and  
8 Practice, Brown University School of Public Health, Providence, Rhode Island, USA

9 <sup>4</sup>Department of Epidemiology, Brown University School of Public Health, Providence, Rhode  
10 Island, USA

11 **Corresponding Author:**

12 Tianjing Li, MD, MHS, PhD,

13 Department of Ophthalmology, School of Medicine, University of Colorado Anschutz

14 Medical Campus, 1675 Aurora Ct., F731, Aurora, CO 80045, USA, Telephone number: 720-  
15 848-502, email: [tianjing.li@cuanschutz.edu](mailto:tianjing.li@cuanschutz.edu)

16 **Co-authors**

17 Paul McCann: Department of Ophthalmology, School of Medicine, University of Colorado  
18 Anschutz Medical Campus, 1675 Aurora Ct., F731, Aurora, CO 80045, USA, email:  
19 [paul.mccann@cuanschutz.edu](mailto:paul.mccann@cuanschutz.edu)

20 Alison Abraham: Department of Epidemiology, Colorado School of Public Health, and  
21 Department of Ophthalmology, School of Medicine, University of Colorado Anschutz  
22 Medical Campus, 1675 Aurora Ct., F731, Aurora, CO 80045, USA, email:  
23 [alison.abraham@cuanschutz.edu](mailto:alison.abraham@cuanschutz.edu)

24 Darren Gregory: Department of Ophthalmology, School of Medicine, University of Colorado  
25 Anschutz Medical Campus, 1675 Aurora Ct., F731, Aurora, CO 80045, USA, email:  
26 [darren.gregory@cuanschutz.edu](mailto:darren.gregory@cuanschutz.edu)

1  
2  
3 27 Scott Hauswirth: Department of Ophthalmology, School of Medicine, University of Colorado  
4  
5 28 Anschutz Medical Campus, 1675 Aurora Ct., F731, Aurora, CO 80045, USA, email:  
6  
7 29 [scott.hauswirth@cuanschutz.edu](mailto:scott.hauswirth@cuanschutz.edu)  
8

9 30 Cristos Infantides: Department of Ophthalmology, School of Medicine, University of Colorado  
10  
11 31 Anschutz Medical Campus, 1675 Aurora Ct., F731, Aurora, CO 80045, USA, email:  
12  
13 32 [cristos.infantides@cuanschutz.edu](mailto:cristos.infantides@cuanschutz.edu)  
14

15 33 Su-Hsun Liu: Department of Ophthalmology, School of Medicine, University of Colorado  
16  
17 34 Anschutz Medical Campus, 1675 Aurora Ct., F731, Aurora, CO 80045, USA, email:  
18  
19 35 [suhsun.liu@cuanschutz.edu](mailto:suhsun.liu@cuanschutz.edu)  
20

21 36 Ian J. Saldanha: Center for Evidence Synthesis in Health, Department of Health Services,  
22  
23 37 Policy, and Practice, and Department of Epidemiology, Brown University School of Public  
24  
25 38 Health, Providence, Rhode Island, USA, email: [ian\\_saldanha@brown.edu](mailto:ian_saldanha@brown.edu)  
26

27 39 Tianjing Li: Department of Ophthalmology, School of Medicine, University of Colorado  
28  
29 40 Anschutz Medical Campus, 1675 Aurora Ct., F731, Aurora, CO 80045, USA, email:  
30  
31 41 [tianjing.li@cuanschutz.edu](mailto:tianjing.li@cuanschutz.edu)  
32

## 33 **ARTICLE SUMMARY**

### 34 **Strengths and limitations of this study**

- 35  
36  
37  
38 44 • This systematic review and meta-analysis aims to report the prevalence and  
39  
40 45 incidence of dry in the United States.  
41  
42 46 • We aim to overcome limitations in previous reviews of dry eye epidemiology reports.  
43  
44 47 • We will use contemporaneous data and comprehensive methods to enhance  
45  
46 48 transparency and reproducibility.  
47  
48 49 • We anticipate high levels of heterogeneity in prevalence and incidence estimates,  
49  
50 50 however we aim to explore the reasons for heterogeneity.  
51  
51 51 • We may rely on prevalence and incidence estimates from secondary data for  
52  
52 52 epidemiological research such as electronic health records which are not primarily  
53  
53 53 designed for research purposes.  
54  
54  
55  
56  
57  
58  
59  
60

1  
2  
3 55 **ABSTRACT**  
4

5 56 **Introduction:** Dry eye is a multifactorial chronic condition characterized by tear film  
6  
7 57 insufficiency and instability, and inflammation of the ocular surface. The prevalence and  
8  
9 58 incidence of dry eye are major determinants of the magnitude of economic and societal  
10  
11 59 costs of the disease. This protocol proposes a systematic review and meta-analysis of the  
12  
13 60 prevalence and incidence of dry eye in the United States.

14  
15 61 **Methods and analysis:** Working with an information specialist, we will develop search  
16  
17 62 strategies for Ovid Medline and Embase for population-based cross-sectional and cohort  
18  
19 63 studies that report the prevalence and/or incidence of dry eye. We will include studies  
20  
21 64 involving persons of all ages from 1 January 2010 to the current date with no language  
22  
23 65 restrictions. We will also hand-search references of included studies, dry eye epidemiology-  
24  
25 66 related systematic reviews, clinical practice guidelines, and literature provided by agencies  
26  
27 67 and organizations.

28  
29 68 Two investigators will independently screen the titles and abstracts, and then full text  
30  
31 69 reports to determine eligibility. One investigator will extract study data and perform risk of  
32  
33 70 bias assessments using tools designed specifically for prevalence and incidence studies. A  
34  
35 71 second investigator will verify all extracted study data and risk of bias assessments. We will  
36  
37 72 assess heterogeneity, qualitatively and quantitatively. When appropriate, we will meta-  
38  
39 73 analyse prevalence and incidence estimates.

40  
41 74 **Ethics and dissemination:** This review does not require approval by an Ethics Committee  
42  
43 75 because it will use published studies. We will publish our results in a peer-reviewed journal  
44  
45 76 and present at relevant conferences.

46  
47 77 **Prospero registration number:** ID256934 (submitted 27 July 2021)

48  
49 78 **Word Count:** 3,017

50  
51 79 **Keywords:** Dry eye, prevalence, incidence, epidemiology, systematic review, United States  
52  
53  
54  
55  
56  
57  
58  
59  
60

## 80 INTRODUCTION

81 Dry eye disease (DED) is defined by the Tear Film and Ocular Surface Society (TFOS) Dry Eye  
82 Workshop II (DEWS-II) as “a multifactorial disease of the ocular surface characterized by a  
83 loss of homeostasis of the tear film, and accompanied by ocular symptoms, in which tear  
84 film instability and hyperosmolarity, ocular surface inflammation and damage, and  
85 neurosensory abnormalities play etiological roles.”[1] Because there is no gold standard  
86 definition of DED, the term “dry eye” is used to describe various presentations of ocular  
87 discomfort and tear film abnormalities. Dry eye is frequently referred to as DED once it is  
88 clinically diagnosed.[2]

89 Irrespective of a clinical diagnosis of DED, dry eye causes considerable burden to patients  
90 and society. Patient burden includes decreased quality of life due to symptoms, such as  
91 foreign body sensation, itching, irritation, soreness, and visual disturbance, which interfere  
92 with reading, driving, and work productivity, and cause physical and emotional distress.[3–  
93 5] Burdens to society include direct economic costs (e.g., healthcare professional visits,  
94 treatment costs),[6] non-direct economic costs (e.g., work productivity loss),[7] and  
95 intangible personal costs (e.g., impaired social, emotional, and physical functioning).[8,9] In  
96 2011, the estimated direct economic cost to the U.S. healthcare system for DED therapy was  
97 \$3.8 billion per year and the estimated total societal cost in the U.S. was \$55.4 billion per  
98 year.[6] Comparative analyses have demonstrated that DED-related costs in the U.S. are  
99 broadly comparable with other countries.[10] However, in the U.S., personal costs may be  
100 higher because treatments, such as ocular lubricants, may not be adequately covered by  
101 health insurance, and drug costs tend to be higher in the United States (US).[6,11] With  
102 introduction of newer and more costly therapies, an even larger societal economic burden  
103 of dry eye can be expected.[12,13] Furthermore, despite being a significant public health  
104 problem, dry eye remains underdiagnosed, highlighting the likelihood that there is a  
105 significant undiagnosed burden of disease.[2,14,15]

106 In 2017, a comprehensive epidemiology report by the TFOS DEWS-II (“TFOS epidemiology  
107 report”) reviewed population-based studies that enrolled at least 500 participants to  
108 estimate the prevalence and incidence of dry eye stratified by definition of disease, age, sex,  
109 and worldwide geographical region.[16] The findings of the TFOS report showed that,  
110 globally, the prevalence of dry eye ranged from 5% to 50% with various definitions of DED.

1  
2  
3 111 However, in dry eye, as well as in other ophthalmic diseases, applying differing definitions of  
4  
5 112 disease to epidemiological datasets can result in widely varying estimates of prevalence.[17]  
6

7 113 In addition to disease definition, various factors may contribute to differences in prevalence  
8  
9 114 of dry eye.[16] The prevalence has been reported to increase with age, especially in  
10  
11 115 women.[14,16,18] To our knowledge, few studies have reported prevalence in people  
12  
13 116 younger than 21 years old, and none were in US-based populations.[18–20] This lack of data  
14  
15 117 is problematic because young people are also at risk of dry eye due to generally longer  
16  
17 118 screen time (e.g., video monitors, digital tablets), and contact lens wear.[19] The TFOS  
18  
19 119 report found no clear pattern of dry eye associated with latitude, globally.[16] However, in  
20  
21 120 the US, there is indirect evidence of an association with latitude, with higher prevalence of  
22  
23 121 dry eye reported in southern regions of the country.[2,14] Furthermore, other geo-  
24  
25 122 environmental factors, such as higher atmospheric pressure, air pollution, humidity, and  
26  
27 123 wind speed, have all been shown to be risk factors for dry eye.[21] As the US comprises an  
28  
29 124 expansive land mass with great variation in climate across latitudinal and topographical  
30  
31 125 regions, and given that climatic factors are influential risk factors for dry eye, it is important  
32  
33 126 to consider these factors when estimating prevalence and incidence of dry eye.

34 127 The literature search for the TFOS Epidemiology report covered a 10-year period from 2005  
35  
36 128 to 2015 (last updated on September 17, 2015). However, it is unclear whether the TFOS  
37  
38 129 epidemiology report strictly followed critical steps in the systematic review process, such as  
39  
40 130 protocol development, risk of bias assessment, and appropriate meta-analysis.[16]

41 131 Furthermore, the TFOS Epidemiology report is now relatively dated because more dry eye-  
42  
43 132 related epidemiological studies have been performed in the US since its publication.[2,22]

44  
45 133 Systematic reviews of dry eye-related epidemiology have been published for other  
46  
47 134 populations and global regions but,[23,24] to our knowledge, there are no existing  
48  
49 135 systematic reviews of dry eye epidemiology within the US. As the prevalence and incidence  
50  
51 136 of dry eye are major determinants of the magnitude of the personal, societal, and economic  
52  
53 137 costs of the disease, examining these epidemiological indices can help health policymakers  
54  
55 138 estimate the burden of dry eye in the US and consequently allocate resources to risk  
56  
57 139 mitigation and treatment as needed.  
58  
59  
60



1  
2  
3 **140 Primary Objective**  
4

5 141 The primary objective of this systematic review and meta-analysis is to summarize the  
6  
7 142 prevalence and incidence of dry eye in persons of all ages in the US.  
8

9  
10 **143 Secondary Objectives**  
11

- 12 144 1. Estimate the prevalence and incidence of dry eye in the US by disease definition, age  
13  
14 145 group, sex, study location, and geo-environmental factors.  
15  
16 146 2. Assess heterogeneity in the prevalence and incidence of dry eye within the US and  
17  
18 147 factors potentially explaining the heterogeneity.  
19  
20 148 3. Report epidemiological factors associated with dry eye.  
21

22 **149 METHODS AND ANALYSIS**  
23

24 150 We have registered for this systematic review protocol with the PROSPERO international  
25  
26 151 register for systematic reviews (ID256934) and we report it in accordance with the Preferred  
27  
28 152 Reporting Items for Systematic Reviews and Meta-Analysis Protocols (PRISMA-P) 2015  
29  
30 153 statement. We will conduct and report the review with guidance from the Joanna Briggs  
31  
32 154 Institute Manual for Evidence Synthesis,[25] the Cochrane Handbook for Systematic Reviews  
33  
34 155 of Interventions,[26] the Meta-analysis of Observational Studies in Epidemiology (MOOSE)  
35  
36 156 guidelines,[27] the Guidelines for Accurate and Transparent Health Estimates Reporting  
37  
38 157 (GATHER) statement,[28] and a meta-epidemiological study on the assessment of  
39  
40 158 prevalence study quality by Migliavaca et al.[29] Patient stakeholders have input into the  
41  
42 159 development of our research strategies as part of our review group advisory board  
43  
44 160 (Cochrane Eyes and Vision, National Eye Institute, National Institutes of Health,  
45  
46 161 UG1EY020522).  
47

48 **162 Criteria for considering studies for this review**  
49

50 163 We used the populations, context, and condition (PCC) framework for the systematic review  
51  
52 164 of prevalence and incidence to formulate the eligibility criteria.[30]  
53

54 **165 Population and Context**  
55

56 166 We will investigate the prevalence and incidence of dry eye in the US population. Prevalence  
57  
58 167 is the proportion of the population with dry eye at a given time (point or period of time).  
59  
60 168 Cumulative incidence is the proportion of persons in the at-risk population who develop a

1  
2  
3 169 new diagnosis of dry eye during a given follow-up period. Incidence rate is the number of  
4  
5 170 new cases of dry eye divided by the observed person-time during a given observation  
6  
7 171 period. We aim to explore the influence of demographic factors (e.g., age, sex),  
8  
9 172 environmental exposures (e.g., air pollution, screen time), meteorological exposures (e.g.,  
10  
11 173 temperature, wind speed, relative humidity, atmospheric pressure), and underlying risk  
12  
13 174 factors of disease (e.g., co-morbidities, topical and systemic medications) on these  
14  
15 175 epidemiological indices.

## 16 176 Condition

17  
18  
19 177 We will use definitions of dry eye outlined in the included primary studies. We will aim to  
20  
21 178 consolidate similar case definitions across studies into homogenous definitions when  
22  
23 179 appropriate. In the TFOS report, case definitions of DED included: (1) Women's Health Study  
24  
25 180 (WHS) criteria (i.e., self-reported physician diagnosis and/or self-reported 'constant' or  
26  
27 181 'often' symptoms),[14] (2) dry eye symptoms alone (e.g., measured by the Ocular Surface  
28  
29 182 Disease Index), (3) dry eye clinical signs alone (e.g., tear break up time), (4) a combination of  
30  
31 183 dry eye signs and symptoms (distinct from WHS criteria), and (5) Meibomian gland  
32  
33 184 dysfunction.[16] We will also consider including the definition of dry eye based on relevant  
34  
35 185 International Classification of Disease codes.

## 36 186 Types of Studies

37  
38 187 We will include population-based observational studies (i.e., cross-sectional studies and  
39  
40 188 cohort studies) that reported prevalence or incidence of dry eye in the US. We will not  
41  
42 189 exclude studies based on characteristics such as sampling frame or sampling methods, but  
43  
44 190 these will be assessed as part of the risk of bias assessment of included studies. We will  
45  
46 191 exclude case reports, case series, case-control studies, and interventional studies. We will  
47  
48 192 exclude population-based studies with fewer than 73 total participants because estimates  
49  
50 193 from samples with less than 73 participants would produce 95% confidence intervals greater  
51  
52 194 than  $\pm 0.05$  when the anticipated minimum population proportion is estimated to be  
53  
54 195 0.05.[31] However, if we find studies on specific population subgroups (e.g., native  
55  
56 196 Americans) that have fewer than 73 total participants we will consider them for inclusion.  
57  
58  
59  
60

## 197 **Search methods for identification of studies**

### 198 Electronic Searches

199 Working with an information specialist, we will develop search strategies for Ovid Medline,  
200 and Embase for population-based studies that report the prevalence and/or incidence of dry  
201 eye. We will include studies involving persons with all ages from 1 January 2010 to the  
202 current date with no language restrictions.

203 The search strategy will include text word as well as controlled vocabulary (e.g., medical  
204 subject headings, Emtree) terms for epidemiological concepts, such as “epidemiology”,  
205 “prevalence”, “incidence”, and “burden of disease”, combined with dry eye-related  
206 concepts, such as “dry eye syndromes” (see Supplementary File).

### 207 Other Sources

208 We will hand-search references of included studies, dry eye epidemiology-related  
209 systematic reviews, and clinical practice guidelines for additional studies. Conference  
210 abstracts will be searched as part of our electronic search of Embase. We will search  
211 literature provided by agencies including the World Health Organization. We will contact  
212 study authors for complete data to calculate prevalence and/or incidence when required.

## 213 **Data collection and analysis**

### 214 Selection of studies

215 We will remove duplicate records and import the search results into Covidence®, a web-  
216 based review management software.[32] Then, two investigators will independently screen  
217 each title and abstract. Investigators will classify each record as 'yes' (relevant), 'maybe'  
218 (possibly relevant) and 'no' (not relevant) for further full-text review. During title/abstract  
219 screening, studies that meet the eligibility criteria for population, context, and condition will  
220 be included for full text screening.

221 We will retrieve the full-text articles for records considered 'relevant' or 'possibly relevant'.  
222 Then, two investigators will independently screen the full-text articles for eligibility and  
223 classify articles as 'to be included' or 'to be excluded'. If there are questions regarding the  
224 eligibility of a given study, we will contact its authors to obtain additional information. If the

1  
2  
3 225 authors do not respond to three emails within 4 weeks, we will use information available  
4  
5 226 from study reports to determine eligibility.  
6

7 227 During the screening process, we will exclude but tag studies of non-US-based populations  
8  
9 228 that otherwise meet the eligibility criteria. This will prove useful should the population  
10  
11 229 eligibility criteria be broadened (e.g., other North American populations) due to sparsity of  
12  
13 230 US-based studies.  
14

15 231 We will review studies in languages other than English that reach full text review based on  
16  
17 232 their title and abstract following translation by Google Translate when possible. We will  
18  
19 233 report reasons for exclusion of full texts in an 'Excluded Studies' table. We will classify  
20  
21 234 studies that meet eligibility criteria but have not yet been completed or have not published  
22  
23 235 full text reports within two years of completion as 'ongoing'. We will resolve discrepancies  
24  
25 236 regarding the classification of the studies by discussion and, where needed, adjudication by  
26  
27 237 a third investigator.  
28

#### 29 238 Data Extraction and Management

30  
31 239 One investigator will extract all relevant study characteristics and other information from  
32  
33 240 included studies into a data collection form using a platform such as the Systematic Review  
34  
35 241 Data Repository Plus (SRDR+). An independent investigator will verify the information for  
36  
37 242 accuracy.[33] We will resolve discrepancies by consensus or, if consensus can't be reached,  
38  
39 243 by adjudication by a third investigator. Where available, we will extract the following data:  
40  
41 244 article information (first author's name, year of publication, country and region where the  
42  
43 245 study was conducted), study design, source population, study population, participant  
44  
45 246 inclusion and exclusion criteria, sampling method, sample size at baseline, index date, dates  
46  
47 247 of follow up, follow up period, region(s) where the participants were recruited, case  
48  
49 248 definition(s), participant characteristics (e.g., age, sex), prevalence, prevalence period,  
50  
51 249 cumulative incidence, incidence rate, and measures of precision. We will extract from each  
52  
53 250 study, all factors included in association analyses (e.g., age and sex are associated with  
54  
55 251 increased prevalence/incidence of dry eye). We will extract estimates (e.g., relative risk) and  
56  
57 252 their precisions for unadjusted and adjusted factors associated with disease. We will record  
58  
59 253 which covariates were included in the multivariable adjusted models of disease association.  
60

## 254 Assessment of Risk of Bias in Included Studies

255 One review author will assess the risk of bias in each included study using specific risk of  
256 bias tools for prevalence and incidence studies. Another investigator will independently  
257 verify the information.[33] Any conflicts will be resolved by discussion or by adjudication by  
258 a third investigator. We will provide tool guides *a priori* for consistent and transparent use  
259 of each tool among investigators.

260 For prevalence studies, we will use the tool proposed by Hoy et al.[34] Items 1 to 4 of the  
261 tool assess the external validity of the study (items 1 and 2 assess sampling bias, and items 3  
262 and 4 assess non-response bias). For item 1, we will address the extent to which the study  
263 population represents the general US population with respect to factors that influence  
264 prevalence and incidence of dry eye. Items 5 to 10 assess internal validity (items 5 to 9  
265 assess ascertainment bias, and item 10 assesses bias related to the analysis). The study is  
266 rated as “high” or “low” risk of bias for each of the 10 items; there is no ‘unclear’ option.  
267 Once all 10 items are rated, we will evaluate the overall risk of bias in the summary  
268 assessment. The summary assessment is a subjective judgement and is not calculated as an  
269 overall sum of the items. There are three options for the summary assessment: ‘high’,  
270 ‘moderate’, and ‘low’ risk of bias.

271 For incidence studies, we will use the Joanna Briggs Institute Critical Appraisal Checklist for  
272 Cohort Studies.[35] The checklist has 11 items, and each item has ‘yes’, ‘no’, ‘unclear’, and  
273 ‘not applicable’ options. There is an additional overall appraisal item with ‘include’, ‘exclude’  
274 and ‘seek further info’ options, and a comment section for the ‘reason of exclusion’. We will  
275 not exclude studies from the systematic review based on the ‘exclude’ response in the  
276 overall appraisal item, but we will interpret this response as ‘high risk of bias’. We will  
277 consider excluding studies from meta-analysis based on an ‘exclude’ response in the overall  
278 appraisal item (i.e., high risk of bias).

## 279 Data Synthesis

280 We will summarize from each study sample characteristics and prevalence and incidence  
281 data with precision estimates, in structured tables.[36] We will also present all reported  
282 potential risk factors for dry eye including their definitions (e.g., age grouping) and

283 estimates for each potential risk factor. All data will be stratified by case definition  
284 whenever feasible.

### 285 Investigation of Heterogeneity

286 We will qualitatively investigate sources of heterogeneity of the data by assessing risk of  
287 bias and other aspects of the design of each study (methodological heterogeneity) and  
288 examining the characteristics of the populations (clinical heterogeneity) in each study,  
289 including age, sex, case definition, and sociodemographic profiles. We will display the  
290 estimates and their uncertainty from each study in forest plots (separately for prevalence  
291 and incidence). We will quantitatively assess statistical heterogeneity by calculating the  
292 amount of heterogeneity ( $\tau^2$ ) and the contribution of heterogeneity to the total variability  
293 across studies ( $I^2$ ).[37]

### 294 Meta-Analyses

295 When appropriate, we will conduct meta-analyses of prevalence and incidence estimates.  
296 We will combine data if the study estimates have acceptable heterogeneity, both  
297 qualitatively and quantitatively. If a study uses more than one case definition and reports  
298 several prevalence and incidence estimates, we will stratify the estimates by case definition  
299 and analyze them in separate subgroup meta-analyses. We will use our clinical expertise and  
300 the literature to judge which case definitions are compatible for pooling in subgroup meta-  
301 analyses. We will also consider stratifying meta-analyses by levels of risk of bias. We will  
302 consider meta-analysis of measures of association for common risk factor covariates across  
303 studies. Whether or not we conduct meta-analyses, we will qualitatively summarize the  
304 findings across studies in a summary of findings table.

305 We will meta-analyse prevalence and cumulative incidence proportions using separate  
306 random-intercept binomial models with a logistic link function via the exact likelihood  
307 method as follows:

$$308 \quad \text{logit}(P(Y_{ik} = 1)) = \theta + b_i \text{ with } b_i \sim N(0, \tau^2) \quad (1)$$

309 We will combine incidence rate using a random-intercept Poisson regression model as  
310 follows:

$$311 \quad Y_i \sim \text{Poisson}(\mu_i) \text{ with } \log(\mu_i) = \beta_0 + b_i + \log(T_i) \text{ and } b_i \sim N(0, \tau^2) \quad (2)$$

1  
2  
3 312 Both models (1) and (2) can be fitted in the Generalized Linear Mixed Model (GLMM)  
4  
5 313 modules available in many popular statistical packages such as SAS, R, and Stata.[38]  
6

## 7 314 **DISCUSSION**

8  
9 315 Dry eye disease is a chronic symptomatic condition that is costly to society, reduces quality  
10 316 of life and is among the leading reasons for presentation to eye care services worldwide. For  
11 317 this reason, the World Health Organization has emphasized that dry eye must not be  
12 318 overlooked when addressing global eye care needs.[39] With demographic ageing,[40]  
13 319 lifestyle changes,[23] climate changes,[2,14,21] and the introduction of newer and more  
14 320 costly therapies,[12] dry eye-related economic costs to the US society can be expected to  
15 321 increase considerably. Hence, contemporaneous burden of disease estimates are necessary  
16 322 to enable health policymakers and research funding bodies make decisions regarding public  
17 323 health interventions and adequate resource allocation.

18 324 Our systematic review and meta-analysis will overcome some of the limitations in previous  
19 325 reviews of dry eye epidemiology reports as we will use contemporaneous data and  
20 326 comprehensive methods to enhance transparency and reproducibility. However, we do  
21 327 anticipate challenges and limitations in our study. Some of the most important limitations  
22 328 will be the anticipated high levels of heterogeneity in prevalence and incidence estimates.  
23 329 But this will provide the opportunity to explore and report the reasons for heterogeneity  
24 330 such as clinical and methodological variations. Other limitations may include reliance on  
25 331 secondary data for epidemiological research such as healthcare utilization databases and  
26 332 electronic health records which are not primarily designed for research purposes.[22,41]  
27 333 Despite these limitations, the information gathered from this study is likely to be widely  
28 334 used by patients, physicians, health policymakers, researchers, and custodians to obtain and  
29 335 allocate funds and other resources to target the prevention and treatment of dry eye.

## 30 336 **ETHICS AND DISSEMINATION**

31 337 This review does not require the approval of an Ethics Committee because it will use  
32 338 previously published studies. We will publish our results in a peer-reviewed journal and  
33 339 present at relevant conferences.  
34  
35  
36  
37  
38  
39  
40  
41  
42  
43  
44  
45  
46  
47  
48  
49  
50  
51  
52  
53  
54  
55  
56  
57  
58  
59  
60



## 340 REFERENCES

- 341 1 Craig JP, Nichols KK, Akpek EK, *et al.* TFOS DEWS II Definition and Classification  
342 Report. *Ocul Surf* 2017;**15**:276–83. doi:<https://doi.org/10.1016/j.jtos.2017.05.008>
- 343 2 Farrand KF, Fridman M, Stillman IÖ, *et al.* Prevalence of Diagnosed Dry Eye Disease in  
344 the United States Among Adults Aged 18 Years and Older. *Am J Ophthalmol*  
345 2017;**182**:90–8. doi:10.1016/j.ajo.2017.06.033
- 346 3 Schiffman RM, Walt JG, Jacobsen G, *et al.* Utility assessment among patients with dry  
347 eye disease. *Ophthalmology* 2003;**110**:1412–9. doi:10.1016/S0161-6420(03)00462-7
- 348 4 Miljanović B, Dana R, Sullivan DA, *et al.* Impact of Dry Eye Syndrome on Vision-  
349 Related Quality of Life. *Am J Ophthalmol* 2007;**143**:409-415.e2.  
350 doi:<https://doi.org/10.1016/j.ajo.2006.11.060>
- 351 5 Galor A, Feuer W, Lee DJ, *et al.* Depression, Post-traumatic Stress Disorder, and Dry  
352 Eye Syndrome: A Study Utilizing the National United States Veterans Affairs  
353 Administrative Database. *Am J Ophthalmol* 2012;**154**:340-346.e2.  
354 doi:10.1016/j.ajo.2012.02.009
- 355 6 Yu J, Asche C V, Fairchild CJ. The Economic Burden of Dry Eye Disease in the United  
356 States: A Decision Tree Analysis. *Cornea* 2011;**30**.
- 357 7 Nichols KK, Bacharach J, Holland E, *et al.* Impact of Dry Eye Disease on Work  
358 Productivity, and Patients' Satisfaction With Over-the-Counter Dry Eye Treatments.  
359 *Invest Ophthalmol Vis Sci* 2016;**57**:2975–82. doi:10.1167/iovs.16-19419
- 360 8 Mertzanis P, Abetz L, Rajagopalan K, *et al.* The Relative Burden of Dry Eye in Patients'  
361 Lives: Comparisons to a U.S. Normative Sample. *Invest Ophthalmol Vis Sci*  
362 2005;**46**:46–50. doi:10.1167/iovs.03-0915
- 363 9 Reddy P, Grad O, Rajagopalan K. The Economic Burden of Dry Eye: A Conceptual  
364 Framework and Preliminary Assessment. *Cornea* 2004;**23**.
- 365 10 McDonald M, Patel DA, Keith MS, *et al.* Economic and Humanistic Burden of Dry Eye  
366 Disease in Europe, North America, and Asia: A Systematic Literature Review. *Ocul Surf*  
367 2016;**14**:144–67. doi:<https://doi.org/10.1016/j.jtos.2015.11.002>
- 368 11 Mulcahy AW, Whaley CM, Gizaw M, *et al.* *International Prescription Drug Price*



- 1  
2  
3 369 *Comparisons: Current Empirical Estimates and Comparisons with Previous Studies.*  
4  
5 370 RAND Corporation PP - Santa Monica, CA 2021. doi:10.7249/RR2956  
6  
7 371 12 Holland EJ, Luchs J, Karpecki PM, *et al.* Lifitegrast for the Treatment of Dry Eye  
8  
9 372 Disease: Results of a Phase III, Randomized, Double-Masked, Placebo-Controlled Trial  
10  
11 373 (OPUS-3). *Ophthalmology* 2017;**124**:53–60. doi:10.1016/j.opthta.2016.09.025  
12  
13 374 13 Pan Q, Angelina A, Marrone M, *et al.* Autologous serum eye drops for dry eye.  
14  
15 375 *Cochrane Database Syst Rev* Published Online First: 2017.  
16  
17 376 doi:10.1002/14651858.CD009327.pub3  
18  
19 377 14 Schaumberg DA, Sullivan DA, Buring JE, *et al.* Prevalence of dry eye syndrome among  
20  
21 378 US women. *Am J Ophthalmol* 2003;**136**:318–26. doi:10.1016/S0002-9394(03)00218-6  
22  
23 379 15 Shimmura S, Shimazaki J, Tsubota K. Results of a Population-Based Questionnaire on  
24  
25 380 the Symptoms and Lifestyles Associated with Dry Eye. *Cornea* 1999;**18**.  
26  
27 381 16 Stapleton F, Alves M, Bunya VY, *et al.* TFOS DEWS II Epidemiology Report. *Ocul Surf*  
28  
29 382 2017;**15**:334–65. doi:https://doi.org/10.1016/j.jtos.2017.05.003  
30  
31 383 17 Wolfs RCW, Borger PH, Ramrattan RS, *et al.* Changing Views on Open-Angle  
32  
33 384 Glaucoma : Definitions and Prevalences — The Rotterdam Study. *Investig Ophthalmol*  
34  
35 385 *Vis Sci* 2000;**41**:3309–3321.  
36  
37 386 18 Paulsen AJ, Cruickshanks KJ, Fischer ME, *et al.* Dry Eye in the Beaver Dam Offspring  
38  
39 387 Study: Prevalence, Risk Factors, and Health-Related Quality of Life. *Am J Ophthalmol*  
40  
41 388 2014;**157**:799–806. doi:10.1016/j.ajo.2013.12.023  
42  
43 389 19 Uchino M, Dogru M, Uchino Y, *et al.* Japan Ministry of Health Study on Prevalence of  
44  
45 390 Dry Eye Disease Among Japanese High School Students. *Am J Ophthalmol*  
46  
47 391 2008;**146**:925-929.e2. doi:10.1016/j.ajo.2008.06.030  
48  
49 392 20 Tan LL, Morgan P, Cai ZQ, *et al.* Prevalence of and risk factors for symptomatic dry eye  
50  
51 393 disease in Singapore. *Clin Exp Optom* 2015;**98**:45–53. doi:10.1111/cxo.12210  
52  
53 394 21 Galor A, Kumar N, Feuer W, *et al.* Environmental Factors Affect the Risk of Dry Eye  
54  
55 395 Syndrome in a United States Veteran Population. *Ophthalmology* 2014;**121**:972-  
56  
57 396 973.e1. doi:10.1016/j.opthta.2013.11.036  
58  
59 397 22 Dana R, Bradley JL, Guerin A, *et al.* Estimated Prevalence and Incidence of Dry Eye

- 1  
2  
3 398 Disease Based on Coding Analysis of a Large, All-age United States Health Care  
4 System. *Am J Ophthalmol* 2019;**202**:47–54. doi:10.1016/j.ajo.2019.01.026  
5 399  
6  
7 400 23 Courtin R, Pereira B, Naughton G, *et al.* Prevalence of dry eye disease in visual display  
8 terminal workers: a systematic review and meta-analysis. *BMJ Open* 2016;**6**:e009675.  
9 401 doi:10.1136/bmjopen-2015-009675  
10 402  
11  
12  
13 403 24 Liu N, Liu L, Li J, *et al.* Prevalence of and Risk Factors for Dry Eye Symptom in  
14 Mainland China: A Systematic Review and Meta-Analysis. *J Ophthalmol*  
15 404 2014;**2014**:748654. doi:10.1155/2014/748654  
16 405  
17  
18  
19 406 25 Aromataris E, Munn Z. *JBIM Manual for Evidence Synthesis*. JBI 2020.  
20 407 doi:10.46658/JBIMES-20-01  
21  
22  
23 408 26 Higgins J, Thomas J, Chandler J, *et al.* *Cochrane Handbook for Systematic Reviews of*  
24 *Interventions version 6.2 (updated February 2021)*. Cochrane 2021.  
25 409  
26  
27  
28 410 27 Stroup DF, Berlin JA, Morton SC, *et al.* Meta-analysis of observational studies in  
29 epidemiology: a proposal for reporting. Meta-analysis of Observational Studies in  
30 411 Epidemiology (MOOSE) group. *JAMA* 2000;**283**:2008–201.  
31 412  
32  
33  
34 413 28 Stevens GA, Alkema L, Black RE, *et al.* Guidelines for Accurate and Transparent Health  
35 414 Estimates Reporting: the GATHER statement. *Lancet* 2016;**388**:e19–23.  
36 415 doi:10.1016/S0140-6736(16)30388-9  
37  
38  
39  
40 416 29 Migliavaca CB, Stein C, Colpani V, *et al.* Quality assessment of prevalence studies: a  
41 417 systematic review. *J Clin Epidemiol* 2020;**127**:59–68.  
42 418 doi:10.1016/j.jclinepi.2020.06.039  
43  
44  
45  
46 419 30 Munn Z, Moola S, Lisy K, *et al.* Methodological guidance for systematic reviews of  
47 420 observational epidemiological studies reporting prevalence and cumulative incidence  
48 data. *JBI Evid Implement* 2015;**13**.  
49 421  
50  
51  
52 422 31 Lemeshow S, Hosmer Jr DW, Klar J, *et al.* *Adequacy of Sample Size in Health Studies*.  
53 423 World Health Organization 1990.  
54  
55  
56 424 32 Veritas Health Innovation Melbourne Australia. Covidence systematic review  
57 425 software.  
58  
59  
60 426 33 Jian-Yu E, Saldanha IJ, Canner J, *et al.* Adjudication rather than experience of data

- 1  
2  
3 427 abstraction matters more in reducing errors in abstracting data in systematic reviews.  
4  
5 428 *Res Synth Methods* 2020;**11**:354–62. doi:<https://doi.org/10.1002/jrsm.1396>  
6  
7 429 34 Hoy D, Brooks P, Woolf A, *et al.* Assessing risk of bias in prevalence studies:  
8  
9 430 modification of an existing tool and evidence of interrater agreement. *J Clin Epidemiol*  
10  
11 431 2012;**65**:934–9. doi:10.1016/j.jclinepi.2011.11.014  
12  
13 432 35 Moola S, Munn Z, Tufanaru C, *et al.* Chapter 7: Systematic reviews of etiology and  
14  
15 433 risk. In: Aromataris E, Munn Z, eds. *Joanna Briggs Institute Reviewer's Manual*. The  
16  
17 434 Joanna Briggs Institute 2017.  
18  
19 435 36 McKenzie JE, Brennan SE. Synthesizing and presenting findings using other methods.  
20  
21 436 In: Higgins J, Thomas J, Chandler J, *et al.*, eds. *Cochrane Handbook for Systematic*  
22  
23 437 *Reviews of Interventions version 6.2 (updated February 2021)*. Cochrane 2021.  
24  
25 438 37 Rücker G, Schwarzer G, Carpenter JR, *et al.* Undue reliance on I2 in assessing  
26  
27 439 heterogeneity may mislead. *BMC Med Res Methodol* 2008;**8**:79. doi:10.1186/1471-  
28  
29 440 2288-8-79  
30  
31 441 38 Stijnen T, Schmid CH, Law M, *et al.* Exact Likelihood Methods for Group-Based  
32  
33 442 Summaries. In: Schmid CH, Stijnen T, White IR, eds. *Handbook of Meta-Analysis*. CRC  
34  
35 443 Press 2021. 65–89.  
36  
37 444 39 World Health Organization. World report on vision. Geneva: World Health  
38  
39 445 Organization: 2019.  
40  
41 446 40 Christensen K, Doblhammer G, Rau R, *et al.* Ageing populations: the challenges ahead.  
42  
43 447 *Lancet* 2009;**374**:1196–208. doi:10.1016/S0140-6736(09)61460-4  
44  
45 448 41 Huybrechts KF, Schneeweiss S. Studies Relying on Secondary Data. In: Lash T I.,  
46  
47 449 VanderWeele TJ, Haneuse S, *et al.*, eds. *Modern Epidemiology*. Wolters Kluwer 2021.  
48  
49 450 247–62.  
50  
51 451  
52  
53 452  
54  
55  
56  
57  
58  
59  
60

1  
2  
3 453 **AUTHOR STATEMENT:**  
4

5 454 Paul McCann: Concept, design, drafting, final submission  
6

7  
8 455 Alison Abraham: Statistical and methodological design, drafting  
9

10 456 Darren Gregory: Design, drafting  
11

12 457 Scott Hauswirth: Design, drafting  
13

14 458 Cristos Ifantides: Design, drafting  
15

16 459 Su-Hsun Liu: Methodological design, drafting  
17

18 460 Ian J. Saldanha: Methodological design, drafting, final submission  
19

20 461 Tianjing Li: Concept, design, drafting, final submission, guarantor  
21

22 462 **DATA STATEMENT:** Data will be made available upon reasonable request.  
23

24 463 **FUNDING:** This work was supported by National Eye Institute, National Institutes of Health,  
25  
26 464 grant number UG1EY020522. The funding body had no role in developing the protocol.  
27

28 465 **CONFLICTS OF INTEREST:** None to declare.  
29

30 466 **ACKNOWLEDGEMENTS:** We would like to acknowledge the contribution of Kristen Desanto,  
31  
32 467 our information specialist, who assisted us with developing the draft search strategy for  
33  
34 468 electronic databases.  
35  
36  
37  
38  
39  
40  
41  
42  
43  
44  
45  
46  
47  
48  
49  
50  
51  
52  
53  
54  
55  
56  
57  
58  
59  
60

1  
2  
3 469 Supplementary File  
4  
5  
6 470 Search strategy draft  
7  
8 471 **MEDLINE (via Ovid MEDLINE® ALL)**  
9 472 1 exp Dry Eye Syndromes/  
10 473 2 exp Keratoconjunctivitis Sicca/  
11 474 3 exp Xerophthalmia/  
12 475 4 exp Meibomian Glands/  
13 476 5 (dry\* adj3 eye\*).tw,kf.  
14 477 6 ((keratoconjunctivitis or kerato-conjunctivitis) adj1 sicca).tw,kf.  
15 478 7 xerophthalmi\*.tw,kf.  
16 479 8 meibomian gland dysfunction.tw,kf.  
17 480 9 exp Sjogren's Syndrome/  
18 481 10 ((Sjogren\* or Sjogren\*) adj1 (syndrom\* or disease\*)).tw,kf.  
19 482 11 (9 or 10) and (exp Eye/ or eye\*.mp. or ocular\*.mp. or ophthalm\*.mp.)  
20 483 12 or/1-8,11  
21 484 13 exp Epidemiology/  
22 485 14 exp Epidemiologic Methods/  
23 486 15 epidemiology.fs.  
24 487 16 burden of disease.tw,kf.  
25 488 17 DALY\*.tw,kf.  
26 489 18 death rate\*.tw,kf.  
27 490 19 Disability Adjusted Life Years.tw,kf.  
28 491 20 disease burden.tw,kf.  
29 492 21 endemic\*.tw,kf.  
30 493 22 epidemic\*.tw,kf.  
31 494 23 epidemiolog\*.tw,kf.  
32 495 24 frequency.tw,kf.  
33 496 25 incidence\*.tw,kf.  
34 497 26 morbidities.tw,kf.  
35 498 27 morbidity.tw,kf.  
36 499 28 occurrence.tw,kf.  
37 500 29 outbreak\*.tw,kf.  
38 501 30 prevalence.tw,kf.  
39 502 31 surveillance.tw,kf.  
40 503 32 survival rate\*.tw,kf.  
41 504 33 years lived with disability.tw,kf.  
42 505 34 years of life lost.tw,kf.  
43 506 35 YLD\*.tw,kf.  
44 507 36 YLL\*.tw,kf.  
45 508 37 or/13-36

1  
2  
3 509 38 12 and 37  
4 510 39 38 NOT (exp animals/ NOT exp humans/)  
5 511 40 limit 39 to yr="2010 -Current"  
6  
7 512 **Embase (via Elsevier)**  
8  
9 513 #1 'dry eye'/exp  
10 514 #2 'dry eye syndrome'/exp  
11 515 #3 'evaporative dry eye disease'/exp  
12 516 #4 'keratoconjunctivitis sicca'/exp  
13 517 #5 'xerophthalmia'/exp  
14 518 #6 'meibomian gland'/exp  
15 519 #7 (dry\* NEAR/3 eye\*):ab,ti,kw  
16 520 #8 ((keratoconjunctivitis or kerato-conjunctivitis) NEAR/1 sicca):ab,ti,kw  
17 521 #9 xerophthalmi\*:ab,ti,kw  
18 522 #10 'meibomian gland dysfunction':ab,ti,kw  
19 523 #11 'Sjogren syndrome'/exp  
20 524 #12 ((Sjogren\* or Sjogren\*) NEAR/1 (syndrom\* or disease\*)):ab,ti,kw  
21 525 #13 (#11 OR #12) AND ('eye'/exp OR eye\* OR ocular\* OR ophthalm\*)  
22 526 #14 #1 OR #2 OR #3 OR #4 OR #5 OR #6 OR #7 OR #8 OR #9 OR #10 OR #13  
23 527 #15 'epidemiology'/exp  
24 528 #16 epidemiology:lnk  
25 529 #17 'burden of disease':ab,ti,kw  
26 530 #18 DALY\*:ab,ti,kw  
27 531 #19 'death rate\*':ab,ti,kw  
28 532 #20 'Disability Adjusted Life Years':ab,ti,kw  
29 533 #21 'disease burden':ab,ti,kw  
30 534 #22 endemic\*:ab,ti,kw  
31 535 #23 epidemic\*:ab,ti,kw  
32 536 #24 epidemiolog\*:ab,ti,kw  
33 537 #25 frequency:ab,ti,kw  
34 538 #26 incidence\*:ab,ti,kw  
35 539 #27 morbidities:ab,ti,kw  
36 540 #28 morbidity:ab,ti,kw  
37 541 #29 occurrence:ab,ti,kw  
38 542 #30 outbreak\*:ab,ti,kw  
39 543 #31 prevalence:ab,ti,kw  
40 544 #32 surveillance:ab,ti,kw  
41 545 #33 'survival rate\*':ab,ti,kw  
42 546 #34 'years lived with disability':ab,ti,kw  
43 547 #35 'years of life lost':ab,ti,kw  
44 548 #36 YLD\*:ab,ti,kw  
45 549 #37 YLL\*:ab,ti,kw  
46  
47  
48  
49  
50  
51  
52  
53  
54  
55  
56  
57  
58  
59  
60

1  
2  
3  
4  
5  
6  
7  
8  
9  
10  
11  
12  
13  
14  
15  
16  
17  
18  
19  
20  
21  
22  
23  
24  
25  
26  
27  
28  
29  
30  
31  
32  
33  
34  
35  
36  
37  
38  
39  
40  
41  
42  
43  
44  
45  
46  
47  
48  
49  
50  
51  
52  
53  
54  
55  
56  
57  
58  
59  
60

550 #38 #15 OR #16 OR #17 OR #18 OR #19 OR #20 OR #21 OR #22 OR #23 OR #24 OR #25  
551 OR #26 OR #27 OR #28 OR #29 OR #30 OR #31 OR #32 OR #33 OR #34 OR #35 OR #36 OR  
552 #37  
553 #39 #14 AND #38  
554 #40 #39 NOT ([animals]/lim NOT [humans]/lim)  
555 #41 #40 AND [2010-2021]/py  
556  
557

For peer review only

558 **PRISMA-P (Preferred Reporting Items for Systematic review and Meta-Analysis**  
 559 **Protocols) 2015 checklist: recommended items to address in a systematic review**  
 560 **protocol\***

| Section and topic                 | Item No | Checklist item                                                                                                                                                                                                                |         |
|-----------------------------------|---------|-------------------------------------------------------------------------------------------------------------------------------------------------------------------------------------------------------------------------------|---------|
| <b>ADMINISTRATIVE INFORMATION</b> |         |                                                                                                                                                                                                                               |         |
| Title:                            |         |                                                                                                                                                                                                                               |         |
| Identification                    | 1a      | Identify the report as a protocol of a systematic review                                                                                                                                                                      | ✓       |
| Update                            | 1b      | If the protocol is for an update of a previous systematic review, identify as such                                                                                                                                            | n/a     |
| Registration                      | 2       | If registered, provide the name of the registry (such as PROSPERO) and registration number                                                                                                                                    | ✓       |
| Authors:                          |         |                                                                                                                                                                                                                               |         |
| Contact                           | 3a      | Provide name, institutional affiliation, e-mail address of all protocol authors; provide physical mailing address of corresponding author                                                                                     | ✓       |
| Contributions                     | 3b      | Describe contributions of protocol authors and identify the guarantor of the review                                                                                                                                           | ✓       |
| Amendments                        | 4       | If the protocol represents an amendment of a previously completed or published protocol, identify as such and list changes; otherwise, state plan for documenting important protocol amendments                               | n/a     |
| Support:                          |         |                                                                                                                                                                                                                               |         |
| Sources                           | 5a      | Indicate sources of financial or other support for the review                                                                                                                                                                 | ✓       |
| Sponsor                           | 5b      | Provide name for the review funder and/or sponsor                                                                                                                                                                             | ✓       |
| Role of sponsor or funder         | 5c      | Describe roles of funder(s), sponsor(s), and/or institution(s), if any, in developing the protocol                                                                                                                            | ✓       |
| <b>INTRODUCTION</b>               |         |                                                                                                                                                                                                                               |         |
| Rationale                         | 6       | Describe the rationale for the review in the context of what is already known                                                                                                                                                 | ✓       |
| Objectives                        | 7       | Provide an explicit statement of the question(s) the review will address with reference to participants, interventions, comparators, and outcomes (PICO)                                                                      | ✓ (PCC) |
| <b>METHODS</b>                    |         |                                                                                                                                                                                                                               |         |
| Eligibility criteria              | 8       | Specify the study characteristics (such as PICO, study design, setting, time frame) and report characteristics (such as years considered, language, publication status) to be used as criteria for eligibility for the review | ✓       |
| Information sources               | 9       | Describe all intended information sources (such as electronic databases, contact with study authors, trial registers or other grey literature sources) with planned dates of coverage                                         | ✓       |
| Search strategy                   | 10      | Present draft of search strategy to be used for at least one electronic database, including planned limits, such that it could be repeated                                                                                    | ✓       |
| Study records:                    |         |                                                                                                                                                                                                                               |         |
| Data management                   | 11a     | Describe the mechanism(s) that will be used to manage records and data throughout the review                                                                                                                                  | ✓       |
| Selection process                 | 11b     | State the process that will be used for selecting studies (such as two independent reviewers) through each phase of the review (that is, screening, eligibility and inclusion in meta-analysis)                               | ✓       |
| Data collection process           | 11c     | Describe planned method of extracting data from reports (such as piloting forms, done independently, in duplicate), any processes for obtaining and confirming data from investigators                                        | ✓       |



|                                    |     |                                                                                                                                                                                                                                                  |     |
|------------------------------------|-----|--------------------------------------------------------------------------------------------------------------------------------------------------------------------------------------------------------------------------------------------------|-----|
| Data items                         | 12  | List and define all variables for which data will be sought (such as PICO items, funding sources), any pre-planned data assumptions and simplifications                                                                                          | ✓   |
| Outcomes and prioritization        | 13  | List and define all outcomes for which data will be sought, including prioritization of main and additional outcomes, with rationale                                                                                                             | ✓   |
| Risk of bias in individual studies | 14  | Describe anticipated methods for assessing risk of bias of individual studies, including whether this will be done at the outcome or study level, or both; state how this information will be used in data synthesis                             | ✓   |
| Data synthesis                     | 15a | Describe criteria under which study data will be quantitatively synthesised                                                                                                                                                                      | ✓   |
|                                    | 15b | If data are appropriate for quantitative synthesis, describe planned summary measures, methods of handling data and methods of combining data from studies, including any planned exploration of consistency (such as $I^2$ , Kendall's $\tau$ ) | ✓   |
|                                    | 15c | Describe any proposed additional analyses (such as sensitivity or subgroup analyses, meta-regression)                                                                                                                                            | ✓   |
|                                    | 15d | If quantitative synthesis is not appropriate, describe the type of summary planned                                                                                                                                                               | ✓   |
| Meta-bias(es)                      | 16  | Specify any planned assessment of meta-bias(es) (such as publication bias across studies, selective reporting within studies)                                                                                                                    | ✓   |
| Confidence in cumulative evidence  | 17  | Describe how the strength of the body of evidence will be assessed (such as GRADE)                                                                                                                                                               | n/a |

561 **\* It is strongly recommended that this checklist be read in conjunction with the PRISMA-P Explanation and**  
 562 **Elaboration (cite when available) for important clarification on the items. Amendments to a review protocol**  
 563 **should be tracked and dated. The copyright for PRISMA-P (including checklist) is held by the PRISMA-P**  
 564 **Group and is distributed under a Creative Commons Attribution Licence 4.0.**

## Supplementary File

## Search strategy draft

**MEDLINE (via Ovid MEDLINE® ALL)**

1 exp Dry Eye Syndromes/  
 2 exp Keratoconjunctivitis Sicca/  
 3 exp Xerophthalmia/  
 4 exp Meibomian Glands/  
 5 (dry\* adj3 eye\*).tw,kf.  
 6 ((keratoconjunctivitis or kerato-conjunctivitis) adj1 sicca).tw,kf.  
 7 xerophthalmi\*.tw,kf.  
 8 meibomian gland dysfunction.tw,kf.  
 9 exp Sjogren's Syndrome/  
 10 ((Sjogren\* or Sjoegren\*) adj1 (syndrom\* or disease\*)).tw,kf.  
 11 (9 or 10) and (exp Eye/ or eye\*.mp. or ocular\*.mp. or ophthalm\*.mp.)  
 12 or/1-8,11  
 13 exp Epidemiology/  
 14 exp Epidemiologic Methods/  
 15 epidemiology.fs.  
 16 burden of disease.tw,kf.  
 17 DALY\*.tw,kf.  
 18 death rate\*.tw,kf.  
 19 Disability Adjusted Life Years.tw,kf.  
 20 disease burden.tw,kf.  
 21 endemic\*.tw,kf.  
 22 epidemic\*.tw,kf.  
 23 epidemiolog\*.tw,kf.  
 24 frequency.tw,kf.  
 25 incidence\*.tw,kf.  
 26 morbidities.tw,kf.  
 27 morbidity.tw,kf.  
 28 occurrence.tw,kf.  
 29 outbreak\*.tw,kf.  
 30 prevalence.tw,kf.  
 31 surveillance.tw,kf.  
 32 survival rate\*.tw,kf.  
 33 years lived with disability.tw,kf.  
 34 years of life lost.tw,kf.  
 35 YLD\*.tw,kf.  
 36 YLL\*.tw,kf.  
 37 or/13-36

1  
2  
3  
4  
5  
6  
7  
8  
9  
10  
11  
12  
13  
14  
15  
16  
17  
18  
19  
20  
21  
22  
23  
24  
25  
26  
27  
28  
29  
30  
31  
32  
33  
34  
35  
36  
37  
38  
39  
40  
41  
42  
43  
44  
45  
46  
47  
48  
49  
50  
51  
52  
53  
54  
55  
56  
57  
58  
59  
60

- 38 12 and 37
- 39 38 NOT (exp animals/ NOT exp humans/)
- 40 limit 39 to yr="2010 -Current"
- Embase (via Elsevier)**
- #1 'dry eye'/exp
- #2 'dry eye syndrome'/exp
- #3 'evaporative dry eye disease'/exp
- #4 'keratoconjunctivitis sicca'/exp
- #5 'xerophthalmia'/exp
- #6 'meibomian gland'/exp
- #7 (dry\* NEAR/3 eye\*):ab,ti,kw
- #8 ((keratoconjunctivitis or kerato-conjunctivitis) NEAR/1 sicca):ab,ti,kw
- #9 xerophthalmi\*:ab,ti,kw
- #10 'meibomian gland dysfunction':ab,ti,kw
- #11 'Sjogren syndrome'/exp
- #12 ((Sjogren\* or Sjogren\*) NEAR/1 (syndrom\* or disease\*)):ab,ti,kw
- #13 (#11 OR #12) AND ('eye'/exp OR eye\* OR ocular\* OR ophthalm\*)
- #14 #1 OR #2 OR #3 OR #4 OR #5 OR #6 OR #7 OR #8 OR #9 OR #10 OR #13
- #15 'epidemiology'/exp
- #16 epidemiology:lnk
- #17 'burden of disease':ab,ti,kw
- #18 DALY\*:ab,ti,kw
- #19 'death rate\*':ab,ti,kw
- #20 'Disability Adjusted Life Years':ab,ti,kw
- #21 'disease burden':ab,ti,kw
- #22 endemic\*:ab,ti,kw
- #23 epidemic\*:ab,ti,kw
- #24 epidemiolog\*:ab,ti,kw
- #25 frequency:ab,ti,kw
- #26 incidence\*:ab,ti,kw
- #27 morbidities:ab,ti,kw
- #28 morbidity:ab,ti,kw
- #29 occurrence:ab,ti,kw
- #30 outbreak\*:ab,ti,kw
- #31 prevalence:ab,ti,kw
- #32 surveillance:ab,ti,kw
- #33 'survival rate\*':ab,ti,kw
- #34 'years lived with disability':ab,ti,kw
- #35 'years of life lost':ab,ti,kw
- #36 YLD\*:ab,ti,kw
- #37 YLL\*:ab,ti,kw

1  
2  
3 #38 #15 OR #16 OR #17 OR #18 OR #19 OR #20 OR #21 OR #22 OR #23 OR #24  
4 OR #25 OR #26 OR #27 OR #28 OR #29 OR #30 OR #31 OR #32 OR #33 OR #34 OR  
5 #35 OR #36 OR #37  
6  
7 #39 #14 AND #38  
8  
9 #40 #39 NOT ([animals]/lim NOT [humans]/lim)  
10  
11 #41 #40 AND [2010-2021]/py  
12  
13  
14  
15  
16  
17  
18  
19  
20  
21  
22  
23  
24  
25  
26  
27  
28  
29  
30  
31  
32  
33  
34  
35  
36  
37  
38  
39  
40  
41  
42  
43  
44  
45  
46  
47  
48  
49  
50  
51  
52  
53  
54  
55  
56  
57  
58  
59  
60

For peer review only

1  
2  
3  
4  
5  
6  
7  
8  
9  
10  
11  
12  
13  
14  
15  
16  
17  
18  
19  
20  
21  
22  
23  
24  
25  
26  
27  
28  
29  
30  
31  
32  
33  
34  
35  
36  
37  
38  
39  
40  
41  
42  
43  
44  
45  
46  
47  
48  
49  
50  
51  
52  
53  
54  
55  
56  
57  
58  
59  
60

1 **PRISMA-P (Preferred Reporting Items for Systematic review and Meta-Analysis**  
2 **Protocols) 2015 checklist: recommended items to address in a systematic review**  
3 **protocol\***

| Section and topic                 | Item No | Checklist item                                                                                                                                                                                                                |         |
|-----------------------------------|---------|-------------------------------------------------------------------------------------------------------------------------------------------------------------------------------------------------------------------------------|---------|
| <b>ADMINISTRATIVE INFORMATION</b> |         |                                                                                                                                                                                                                               |         |
| Title:                            |         |                                                                                                                                                                                                                               |         |
| Identification                    | 1a      | Identify the report as a protocol of a systematic review                                                                                                                                                                      | ✓       |
| Update                            | 1b      | If the protocol is for an update of a previous systematic review, identify as such                                                                                                                                            | n/a     |
| Registration                      | 2       | If registered, provide the name of the registry (such as PROSPERO) and registration number                                                                                                                                    | ✓       |
| Authors:                          |         |                                                                                                                                                                                                                               |         |
| Contact                           | 3a      | Provide name, institutional affiliation, e-mail address of all protocol authors; provide physical mailing address of corresponding author                                                                                     | ✓       |
| Contributions                     | 3b      | Describe contributions of protocol authors and identify the guarantor of the review                                                                                                                                           | ✓       |
| Amendments                        | 4       | If the protocol represents an amendment of a previously completed or published protocol, identify as such and list changes; otherwise, state plan for documenting important protocol amendments                               | n/a     |
| Support:                          |         |                                                                                                                                                                                                                               |         |
| Sources                           | 5a      | Indicate sources of financial or other support for the review                                                                                                                                                                 | ✓       |
| Sponsor                           | 5b      | Provide name for the review funder and/or sponsor                                                                                                                                                                             | ✓       |
| Role of sponsor or funder         | 5c      | Describe roles of funder(s), sponsor(s), and/or institution(s), if any, in developing the protocol                                                                                                                            | ✓       |
| <b>INTRODUCTION</b>               |         |                                                                                                                                                                                                                               |         |
| Rationale                         | 6       | Describe the rationale for the review in the context of what is already known                                                                                                                                                 | ✓       |
| Objectives                        | 7       | Provide an explicit statement of the question(s) the review will address with reference to participants, interventions, comparators, and outcomes (PICO)                                                                      | ✓ (PCC) |
| <b>METHODS</b>                    |         |                                                                                                                                                                                                                               |         |
| Eligibility criteria              | 8       | Specify the study characteristics (such as PICO, study design, setting, time frame) and report characteristics (such as years considered, language, publication status) to be used as criteria for eligibility for the review | ✓       |
| Information sources               | 9       | Describe all intended information sources (such as electronic databases, contact with study authors, trial registers or other grey literature sources) with planned dates of coverage                                         | ✓       |
| Search strategy                   | 10      | Present draft of search strategy to be used for at least one electronic database, including planned limits, such that it could be repeated                                                                                    | ✓       |
| Study records:                    |         |                                                                                                                                                                                                                               |         |
| Data management                   | 11a     | Describe the mechanism(s) that will be used to manage records and data throughout the review                                                                                                                                  | ✓       |
| Selection process                 | 11b     | State the process that will be used for selecting studies (such as two independent reviewers) through each phase of the review (that is, screening, eligibility and inclusion in meta-analysis)                               | ✓       |
| Data collection process           | 11c     | Describe planned method of extracting data from reports (such as piloting forms, done independently, in duplicate), any processes for obtaining and confirming data from investigators                                        | ✓       |

|                                    |     |                                                                                                                                                                                                                                                  |     |
|------------------------------------|-----|--------------------------------------------------------------------------------------------------------------------------------------------------------------------------------------------------------------------------------------------------|-----|
| Data items                         | 12  | List and define all variables for which data will be sought (such as PICO items, funding sources), any pre-planned data assumptions and simplifications                                                                                          | ✓   |
| Outcomes and prioritization        | 13  | List and define all outcomes for which data will be sought, including prioritization of main and additional outcomes, with rationale                                                                                                             | ✓   |
| Risk of bias in individual studies | 14  | Describe anticipated methods for assessing risk of bias of individual studies, including whether this will be done at the outcome or study level, or both; state how this information will be used in data synthesis                             | ✓   |
| Data synthesis                     | 15a | Describe criteria under which study data will be quantitatively synthesised                                                                                                                                                                      | ✓   |
|                                    | 15b | If data are appropriate for quantitative synthesis, describe planned summary measures, methods of handling data and methods of combining data from studies, including any planned exploration of consistency (such as $I^2$ , Kendall's $\tau$ ) | ✓   |
|                                    | 15c | Describe any proposed additional analyses (such as sensitivity or subgroup analyses, meta-regression)                                                                                                                                            | ✓   |
|                                    | 15d | If quantitative synthesis is not appropriate, describe the type of summary planned                                                                                                                                                               | ✓   |
| Meta-bias(es)                      | 16  | Specify any planned assessment of meta-bias(es) (such as publication bias across studies, selective reporting within studies)                                                                                                                    | ✓   |
| Confidence in cumulative evidence  | 17  | Describe how the strength of the body of evidence will be assessed (such as GRADE)                                                                                                                                                               | n/a |

4 **\* It is strongly recommended that this checklist be read in conjunction with the PRISMA-P Explanation and**  
5 **Elaboration (cite when available) for important clarification on the items. Amendments to a review protocol**  
6 **should be tracked and dated. The copyright for PRISMA-P (including checklist) is held by the PRISMA-P**  
7 **Group and is distributed under a Creative Commons Attribution Licence 4.0.**

# BMJ Open

## Prevalence and incidence of dry eye in the United States: a systematic review protocol

|                                 |                                                                                                                                                                                                                                                                                                                                                                                                                                                                                                                                                                                                                                                                                                                                                                                                                                                                             |
|---------------------------------|-----------------------------------------------------------------------------------------------------------------------------------------------------------------------------------------------------------------------------------------------------------------------------------------------------------------------------------------------------------------------------------------------------------------------------------------------------------------------------------------------------------------------------------------------------------------------------------------------------------------------------------------------------------------------------------------------------------------------------------------------------------------------------------------------------------------------------------------------------------------------------|
| Journal:                        | <i>BMJ Open</i>                                                                                                                                                                                                                                                                                                                                                                                                                                                                                                                                                                                                                                                                                                                                                                                                                                                             |
| Manuscript ID                   | bmjopen-2021-056203.R1                                                                                                                                                                                                                                                                                                                                                                                                                                                                                                                                                                                                                                                                                                                                                                                                                                                      |
| Article Type:                   | Protocol                                                                                                                                                                                                                                                                                                                                                                                                                                                                                                                                                                                                                                                                                                                                                                                                                                                                    |
| Date Submitted by the Author:   | 13-Oct-2021                                                                                                                                                                                                                                                                                                                                                                                                                                                                                                                                                                                                                                                                                                                                                                                                                                                                 |
| Complete List of Authors:       | McCann, Paul; University of Colorado - Anschutz Medical Campus, Department of Ophthalmology<br>Abraham, Alison; University of Colorado - Anschutz Medical Campus, Department of Epidemiology, Colorado School of Public Health, and Department of Ophthalmology<br>Gregory, Darren G.; University of Colorado - Anschutz Medical Campus, Department of Ophthalmology<br>Hauswirth, Scott; University of Colorado - Anschutz Medical Campus, Department of Ophthalmology<br>Ifantides, Cristos; University of Colorado - Anschutz Medical Campus, Department of Ophthalmology<br>Liu, Su-Hsun; University of Colorado - Anschutz Medical Campus, Department of Ophthalmology<br>Saldanha, Ian; Brown University School of Public Health, Health Services, Policy and Practice<br>Li, Tianjing; University of Colorado - Anschutz Medical Campus, Department of Ophthalmology |
| <b>Primary Subject Heading</b>: | Ophthalmology                                                                                                                                                                                                                                                                                                                                                                                                                                                                                                                                                                                                                                                                                                                                                                                                                                                               |
| Secondary Subject Heading:      | Epidemiology                                                                                                                                                                                                                                                                                                                                                                                                                                                                                                                                                                                                                                                                                                                                                                                                                                                                |
| Keywords:                       | Corneal and external diseases < OPHTHALMOLOGY, EPIDEMIOLOGY, PUBLIC HEALTH                                                                                                                                                                                                                                                                                                                                                                                                                                                                                                                                                                                                                                                                                                                                                                                                  |
|                                 |                                                                                                                                                                                                                                                                                                                                                                                                                                                                                                                                                                                                                                                                                                                                                                                                                                                                             |

SCHOLARONE™  
Manuscripts



I, the Submitting Author has the right to grant and does grant on behalf of all authors of the Work (as defined in the below author licence), an exclusive licence and/or a non-exclusive licence for contributions from authors who are: i) UK Crown employees; ii) where BMJ has agreed a CC-BY licence shall apply, and/or iii) in accordance with the terms applicable for US Federal Government officers or employees acting as part of their official duties; on a worldwide, perpetual, irrevocable, royalty-free basis to BMJ Publishing Group Ltd ("BMJ") its licensees and where the relevant Journal is co-owned by BMJ to the co-owners of the Journal, to publish the Work in this journal and any other BMJ products and to exploit all rights, as set out in our [licence](#).

The Submitting Author accepts and understands that any supply made under these terms is made by BMJ to the Submitting Author unless you are acting as an employee on behalf of your employer or a postgraduate student of an affiliated institution which is paying any applicable article publishing charge ("APC") for Open Access articles. Where the Submitting Author wishes to make the Work available on an Open Access basis (and intends to pay the relevant APC), the terms of reuse of such Open Access shall be governed by a Creative Commons licence – details of these licences and which [Creative Commons](#) licence will apply to this Work are set out in our licence referred to above.

Other than as permitted in any relevant BMJ Author's Self Archiving Policies, I confirm this Work has not been accepted for publication elsewhere, is not being considered for publication elsewhere and does not duplicate material already published. I confirm all authors consent to publication of this Work and authorise the granting of this licence.



1 **Title:** Prevalence and incidence of dry eye in the United States: a systematic review protocol

2 **Authors:** Paul McCann<sup>1</sup>, Alison G. Abraham<sup>1,2</sup>, Darren G. Gregory<sup>1</sup>, Scott Hauswirth<sup>1</sup>, Cristos  
3 Ifantides<sup>1</sup>, Su-Hsun Liu<sup>1</sup>, Ian J. Saldanha<sup>3,4</sup>, Tianjing Li<sup>1,2</sup>

4 <sup>1</sup>Department of Ophthalmology, School of Medicine, University of Colorado Anschutz  
5 Medical Campus, Colorado, USA

6 <sup>2</sup>Department of Epidemiology, Colorado School of Public Health, Colorado, USA

7 <sup>3</sup>Center for Evidence Synthesis in Health, Department of Health Services, Policy, and  
8 Practice, Brown University School of Public Health, Providence, Rhode Island, USA

9 <sup>4</sup>Department of Epidemiology, Brown University School of Public Health, Providence, Rhode  
10 Island, USA

11 **Corresponding Author:**

12 Tianjing Li, MD, MHS, PhD,

13 Department of Ophthalmology, School of Medicine, University of Colorado Anschutz

14 Medical Campus, 1675 Aurora Ct., F731, Aurora, CO 80045, USA, Telephone number: 720-  
15 848-502, email: [tianjing.li@cuanschutz.edu](mailto:tianjing.li@cuanschutz.edu)

16 **Co-authors**

17 Paul McCann: Department of Ophthalmology, School of Medicine, University of Colorado  
18 Anschutz Medical Campus, 1675 Aurora Ct., F731, Aurora, CO 80045, USA, email:  
19 [paul.mccann@cuanschutz.edu](mailto:paul.mccann@cuanschutz.edu)

20 Alison Abraham: Department of Epidemiology, Colorado School of Public Health, and  
21 Department of Ophthalmology, School of Medicine, University of Colorado Anschutz  
22 Medical Campus, 1675 Aurora Ct., F731, Aurora, CO 80045, USA, email:  
23 [alison.abraham@cuanschutz.edu](mailto:alison.abraham@cuanschutz.edu)

24 Darren Gregory: Department of Ophthalmology, School of Medicine, University of Colorado  
25 Anschutz Medical Campus, 1675 Aurora Ct., F731, Aurora, CO 80045, USA, email:  
26 [darren.gregory@cuanschutz.edu](mailto:darren.gregory@cuanschutz.edu)

- 1  
2  
3 27 Scott Hauswirth: Department of Ophthalmology, School of Medicine, University of Colorado  
4  
5 28 Anschutz Medical Campus, 1675 Aurora Ct., F731, Aurora, CO 80045, USA, email:  
6  
7 29 [scott.hauswirth@cuanschutz.edu](mailto:scott.hauswirth@cuanschutz.edu)  
8  
9 30 Cristos Infantides: Department of Ophthalmology, School of Medicine, University of Colorado  
10  
11 31 Anschutz Medical Campus, 1675 Aurora Ct., F731, Aurora, CO 80045, USA, email:  
12  
13 32 [cristos.infantides@cuanschutz.edu](mailto:cristos.infantides@cuanschutz.edu)  
14  
15 33 Su-Hsun Liu: Department of Ophthalmology, School of Medicine, University of Colorado  
16  
17 34 Anschutz Medical Campus, 1675 Aurora Ct., F731, Aurora, CO 80045, USA, email:  
18  
19 35 [suhsun.liu@cuanschutz.edu](mailto:suhsun.liu@cuanschutz.edu)  
20  
21 36 Ian J. Saldanha: Center for Evidence Synthesis in Health, Department of Health Services,  
22  
23 37 Policy, and Practice, and Department of Epidemiology, Brown University School of Public  
24  
25 38 Health, Providence, Rhode Island, USA, email: [ian\\_saldanha@brown.edu](mailto:ian_saldanha@brown.edu)  
26  
27 39 Tianjing Li: Department of Ophthalmology, School of Medicine, University of Colorado  
28  
29 40 Anschutz Medical Campus, 1675 Aurora Ct., F731, Aurora, CO 80045, USA, email:  
30  
31 41 [tianjing.li@cuanschutz.edu](mailto:tianjing.li@cuanschutz.edu)  
32  
33  
34  
35  
36 43  
37  
38  
39  
40  
41  
42  
43  
44  
45  
46  
47  
48  
49  
50  
51  
52  
53  
54  
55  
56  
57  
58  
59  
60

## 44 **ABSTRACT**

45 **Introduction:** Dry eye is a multifactorial chronic condition characterized by tear film  
46 insufficiency and instability, and ocular symptoms including foreign body sensation, itching,  
47 irritation, soreness, and visual disturbance. The prevalence and incidence of dry eye are  
48 major determinants of the magnitude of economic and societal costs of the disease. This  
49 protocol proposes a systematic review and meta-analysis of the prevalence and incidence of  
50 dry eye in the United States.

51 **Methods and analysis:** Working with an information specialist, we will develop search  
52 strategies for Ovid Medline and Embase for population-based cross-sectional and cohort  
53 studies involving US-based populations that report the prevalence and/or incidence of dry  
54 eye. We will include studies involving persons of all ages from 1 January 2010 to the current  
55 date with no language restrictions. We will also hand-search references of included studies,  
56 dry eye epidemiology-related systematic reviews, clinical practice guidelines, and literature  
57 provided by agencies and organizations.

58 Two investigators will independently screen the titles and abstracts, and then full text  
59 reports to determine eligibility. One investigator will extract study data and perform risk of  
60 bias assessments using tools designed specifically for prevalence and incidence studies. A  
61 second investigator will verify all extracted study data and risk of bias assessments. We will  
62 assess heterogeneity, qualitatively and quantitatively. When appropriate, we will meta-  
63 analyse prevalence and incidence estimates.

64 **Ethics and dissemination:** This review does not require approval by an Ethics Committee  
65 because it will use published studies. We will publish our results in a peer-reviewed journal  
66 and present at relevant conferences.

67 **Prospero registration number:** CRD42021256934

68 **Word Count:** 3,716

69 **Keywords:** Dry eye, prevalence, incidence, epidemiology, systematic review, United States

## 70 **ARTICLE SUMMARY**

71 **Strengths and limitations of this study**

- 1  
2  
3 72 • This systematic review and meta-analysis aims to report the prevalence and  
4 incidence of dry in the United States.  
5 73  
6  
7 74 • We aim to overcome limitations in previous reviews of dry eye epidemiology reports.  
8  
9 75 • We will use contemporaneous data and comprehensive methods to enhance  
10 transparency and reproducibility.  
11 76  
12 77 • We anticipate high levels of heterogeneity in prevalence and incidence estimates,  
13 however we aim to explore the reasons for heterogeneity.  
14 78  
15  
16 79

For peer review only

## 80 INTRODUCTION

81 Dry eye disease (DED) is defined by the Tear Film and Ocular Surface Society (TFOS) Dry Eye  
82 Workshop II (DEWS-II) as “a multifactorial disease of the ocular surface characterized by a  
83 loss of homeostasis of the tear film, and accompanied by ocular symptoms, in which tear  
84 film instability and hyperosmolarity, ocular surface inflammation and damage, and  
85 neurosensory abnormalities play etiological roles.”[1] Because there is no gold standard  
86 diagnostic test for DED, the term “dry eye” is used to describe various presentations of  
87 ocular discomfort and tear film abnormalities. Dry eye is frequently referred to as DED once  
88 it is clinically diagnosed.[2]

89 Irrespective of a clinical diagnosis of DED, dry eye causes considerable burden to patients  
90 and society. Patient burden includes decreased quality of life due to symptoms, such as  
91 foreign body sensation, itching, irritation, soreness, and visual disturbance, which interfere  
92 with reading, driving, and work productivity, and cause physical and emotional distress.[3–  
93 5] Burdens to society include direct economic costs (e.g., healthcare professional visits,  
94 treatment costs),[6] non-direct economic costs (e.g., work productivity loss),[7] and  
95 intangible personal costs (e.g., impaired social, emotional, and physical functioning).[8,9] In  
96 2011, the estimated direct economic cost to the United States (US) healthcare system for  
97 DED therapy was \$3.8 billion per year and the estimated total societal cost in the U.S. was  
98 \$55.4 billion per year.[6] Comparative analyses have demonstrated that DED-related costs  
99 in the U.S. are broadly comparable with other countries.[10] However, in the US, personal  
100 costs may be higher because treatments, such as ocular lubricants, may not be adequately  
101 covered by health insurance, and drug costs tend to be higher in the US.[6,11] With  
102 introduction of newer and more costly therapies, an even larger societal and personal  
103 economic burden of dry eye can be expected.[12–14] Furthermore, despite being a  
104 significant public health problem, dry eye remains underdiagnosed, highlighting the  
105 likelihood that there is a significant undiagnosed burden of disease.[2,15,16]

106 In 2017, a comprehensive epidemiology report by the TFOS DEWS-II (“TFOS epidemiology  
107 report”) reviewed population-based studies that enrolled at least 500 participants to  
108 estimate the prevalence and incidence of dry eye stratified by definition of disease, age, sex,  
109 and worldwide geographical region.[17] The findings of the TFOS report showed that,  
110 globally, the prevalence of dry eye ranged from 5% to 50% with various definitions of DED.

1  
2  
3 111 However, in dry eye, as well as in other ophthalmic diseases, applying differing definitions of  
4 112 disease to epidemiological datasets can result in widely varying estimates of prevalence.[18]  
5  
6  
7 113 In addition to disease definition, various factors may contribute to differences in prevalence  
8  
9 114 of dry eye.[17] The prevalence has been reported to increase with age, especially in  
10  
11 115 women.[15,17,19] To our knowledge, few studies have reported prevalence in people  
12  
13 116 younger than 21 years old, and none were in US-based populations.[19–21] This lack of data  
14  
15 117 is problematic because young people are also at risk of dry eye due to generally longer  
16  
17 118 screen time (e.g., video monitors, digital tablets), and contact lens wear.[20] The TFOS  
18  
19 119 report found no clear pattern of dry eye associated with latitude, globally.[17] However, in  
20  
21 120 the US, there is indirect evidence of an association with latitude, with higher prevalence of  
22  
23 121 dry eye reported in southern regions of the country.[2,15] Furthermore, other geo-  
24  
25 122 environmental factors, such as higher atmospheric pressure, air pollution, humidity, and  
26  
27 123 wind speed, have all been shown to be risk factors for dry eye.[22] As the US comprises an  
28  
29 124 expansive land mass with great variation in climate across latitudinal and topographical  
30  
31 125 regions, and given that climatic factors are influential risk factors for dry eye, it is important  
32  
33 126 to consider these factors when estimating prevalence and incidence of dry eye.  
34  
35 127 The literature search for the TFOS Epidemiology report covered a 10-year period from 2005  
36  
37 128 to 2015 (last updated on September 17, 2015). However, it is unclear whether the TFOS  
38  
39 129 epidemiology report strictly followed critical steps in the systematic review process, such as  
40  
41 130 protocol development, risk of bias assessment, and appropriate meta-analysis.[17]  
42  
43 131 Furthermore, the TFOS Epidemiology report is now relatively dated because more dry eye-  
44  
45 132 related epidemiological studies have been performed in the US since its publication.[2,23]  
46  
47 133 Systematic reviews of dry eye-related epidemiology have been published for other  
48  
49 134 populations and global regions but,[24,25] to our knowledge, there are no existing  
50  
51 135 systematic reviews of dry eye epidemiology within the US. As the prevalence and incidence  
52  
53 136 of dry eye are major determinants of the magnitude of the personal, societal, and economic  
54  
55 137 costs of the disease, examining these epidemiological indices can help health policymakers  
56  
57 138 estimate the burden of dry eye in the US and consequently allocate resources to risk  
58  
59 139 mitigation and treatment as needed.  
60

## 140 **Primary Objective**

141 The primary objective of this systematic review and meta-analysis is to summarize the  
142 prevalence and incidence of dry eye in persons of all ages in the US.

## 143 **Secondary Objectives**

- 144 1. Estimate the effect of disease definition, age group, sex, US region, and geo-  
145 environmental factors on prevalence and incidence of dry eye in the US by using meta-  
146 regression methods.
- 147 2. Assess heterogeneity in the prevalence and incidence of dry eye within the US and  
148 factors potentially explaining the heterogeneity.
- 149 3. Report epidemiological factors associated with dry eye.

## 150 **METHODS AND ANALYSIS**

151 We have registered for this systematic review protocol with the PROSPERO international  
152 register for systematic reviews (CRD42021256934) and we report it in accordance with the  
153 Preferred Reporting Items for Systematic Reviews and Meta-Analysis Protocols (PRISMA-P)  
154 2015 statement (see Supplementary File 1). We will conduct and report the review with  
155 guidance from the Joanna Briggs Institute Manual for Evidence Synthesis,[26] the Cochrane  
156 Handbook for Systematic Reviews of Interventions,[27] the Meta-analysis of Observational  
157 Studies in Epidemiology (MOOSE) guidelines,[28] the Guidelines for Accurate and  
158 Transparent Health Estimates Reporting (GATHER) statement,[29] and a meta-  
159 epidemiological study on the assessment of prevalence study quality by Migliavaca et al.[30]

## 160 **Patient and Public Involvement**

161 No patient involved.

## 162 **Criteria for considering studies for this review**

163 We used the populations, context, and condition (PCC) framework for the systematic review  
164 of prevalence and incidence to formulate the eligibility criteria.[31]

### 165 **Population and Context**

166 We will investigate the prevalence and incidence of dry eye in the US population (i.e., the  
167 target population). Prevalence is the proportion of the population with dry eye at a given  
168 time (point or period of time). Cumulative incidence is the proportion of persons in the at-

1  
2  
3 169 risk population who develop a new diagnosis of dry eye during a given follow-up period.  
4  
5 170 Incidence rate is the number of new cases of dry eye divided by the observed person-time  
6  
7 171 during a given observation period. We aim to explore the influence of demographic factors  
8  
9 172 (e.g., age, sex), environmental exposures (e.g., air pollution, screen time), meteorological  
10  
11 173 exposures (e.g., temperature, wind speed, relative humidity, atmospheric pressure), and  
12  
13 174 underlying risk factors of disease (e.g., co-morbidities, topical and systemic medications) on  
14  
15 175 these epidemiological indices. Our source populations will be from studies conducted within  
16  
17 176 the US and studies conducted outside the US are not eligible. However, the target  
18  
19 177 population may be broadened to Continental North American populations if there is a  
20  
21 178 sparsity of US-based studies (i.e., less than two US-based studies) although this is not  
22  
23 179 expected.

#### 24 180 Condition

25  
26 181 We will use definitions of dry eye outlined in the included primary studies. We will aim to  
27  
28 182 consolidate similar case definitions across studies into homogenous definitions when  
29  
30 183 appropriate. In the TFOS report, case definitions of DED included: (1) Women's Health Study  
31  
32 184 (WHS) criteria (i.e., self-reported physician diagnosis and/or self-reported 'constant' or  
33  
34 185 'often' symptoms),[15] (2) dry eye symptoms when signs were not measured (e.g.,  
35  
36 186 measured by the Ocular Surface Disease Index), (3) dry eye clinical signs when symptoms  
37  
38 187 were not measured (e.g., tear break up time), (4) a combination of dry eye signs and  
39  
40 188 symptoms (distinct from WHS criteria), and (5) Meibomian gland dysfunction.[17] We will  
41  
42 189 also include dry eye definitions based on relevant International Classification of Disease  
43  
44 190 codes.

#### 45 191 Types of Studies

46  
47 192 We will include population-based observational studies (i.e., cross-sectional studies and  
48  
49 193 cohort studies) that reported prevalence or incidence of dry eye in the US. We will not  
50  
51 194 exclude studies based on characteristics such as sampling frame or sampling methods, but  
52  
53 195 these will be assessed as part of the risk of bias assessment of included studies. We will  
54  
55 196 exclude case reports, case series, case-control studies, and interventional studies. We will  
56  
57 197 exclude population-based studies with fewer than 73 total participants because estimates  
58  
59 198 from samples with less than 73 participants would produce 95% confidence intervals greater  
60  
199 than  $\pm 0.05$  when the anticipated minimum population proportion is estimated to be



1  
2  
3 200 0.05.[32] However, if we find studies on specific population subgroups (e.g., native  
4  
5 201 Americans) that have fewer than 73 total participants we will consider them for inclusion.  
6

## 7 202 **Search methods for identification of studies**

### 9 203 Electronic Searches

11 204 Working with an information specialist, we will develop search strategies for Ovid Medline,  
12  
13 205 and Embase for population-based studies that report the prevalence and/or incidence of dry  
14  
15 206 eye. We will include studies involving persons with all ages from 1 January 2010 to the  
16  
17 207 current date with no language restrictions. The search strategy will include text word as well  
18  
19 208 as controlled vocabulary (e.g., medical subject headings, Emtree) terms for epidemiological  
20  
21 209 concepts, such as “epidemiology”, “prevalence”, “incidence”, and “burden of disease”,  
22  
23 210 combined with dry eye-related concepts, such as “dry eye syndromes” (see Supplementary  
24  
25 211 File 2).

### 27 212 Other Sources

29 213 We will hand-search references of included studies, dry eye epidemiology-related  
30  
31 214 systematic reviews, and clinical practice guidelines for additional studies. Conference  
32  
33 215 abstracts will be searched as part of our electronic search of Embase. We will search  
34  
35 216 literature provided by agencies including the World Health Organization. We will contact  
36  
37 217 study authors for complete data to calculate prevalence and/or incidence when required.  
38

## 39 218 **Data collection and analysis**

### 41 219 Selection of studies

43 220 We will remove duplicate records and import the search results into Covidence®, a web-  
44  
45 221 based review management software.[33] Then, two investigators will independently screen  
46  
47 222 each title and abstract. Investigators will classify each record as 'yes' (relevant), 'maybe'  
48  
49 223 (possibly relevant) and 'no' (not relevant) for further full-text review. During title/abstract  
50  
51 224 screening, studies that meet the eligibility criteria for population, context, and condition will  
52  
53 225 be included for full text screening.

55 226 We will retrieve the full-text articles for records considered 'relevant' or 'possibly relevant'.  
56  
57 227 Then, two investigators will independently screen the full-text articles for eligibility and  
58  
59 228 classify articles as 'to be included' or 'to be excluded'. If there are questions regarding the  
60

1  
2  
3 229 eligibility of a given study, we will contact its authors to obtain additional information. If the  
4  
5 230 authors do not respond to three emails within 4 weeks, we will use information available  
6  
7 231 from study reports to determine eligibility.  
8

9 232 During the screening process, we will exclude but tag studies of non-US-based populations  
10  
11 233 that otherwise meet the eligibility criteria. This will prove useful should the population  
12  
13 234 eligibility criteria be broadened (i.e., Continental North American populations) due to  
14  
15 235 sparsity of US-based studies.

16  
17 236 We will review studies in languages other than English that reach full text review based on  
18  
19 237 their title and abstract following translation by Google Translate when possible. We will  
20  
21 238 report reasons for exclusion of full texts in an 'Excluded Studies' table. We will classify  
22  
23 239 studies that meet eligibility criteria but have not yet been completed or have not published  
24  
25 240 full text reports within two years of completion as 'ongoing'. We will resolve discrepancies  
26  
27 241 regarding the classification of the studies by discussion and, where needed, adjudication by  
28  
29 242 a third investigator.

#### 30 243 Data Extraction and Management

31  
32 244 One investigator will extract all relevant study characteristics and other information from  
33  
34 245 included studies into a data collection form using a platform such as the Systematic Review  
35  
36 246 Data Repository Plus (SRDR+). An independent investigator will verify the information for  
37  
38 247 accuracy.[34] We will resolve discrepancies by consensus or, if consensus can't be reached,  
39  
40 248 by adjudication by a third investigator. Where available, we will extract the following data:  
41  
42 249 article information (first author's name, year of publication, country and region where the  
43  
44 250 study was conducted), study design, source population, study population, participant  
45  
46 251 inclusion and exclusion criteria, sampling method, sample size at baseline, index date, dates  
47  
48 252 of follow up, follow up period, region(s) where the participants were recruited, case  
49  
50 253 definition(s), participant characteristics (e.g., age, sex), prevalence, prevalence period,  
51  
52 254 cumulative incidence, incidence rate, and measures of precision. We will extract from each  
53  
54 255 study, all factors included in association analyses (e.g., age and sex are associated with  
55  
56 256 increased prevalence/incidence of dry eye). We will extract estimates (e.g., relative risk) and  
57  
58 257 their precisions for unadjusted and adjusted factors associated with disease. We will record  
59  
60 258 which covariates were included in the multivariable adjusted models of disease association.

## 259 Assessment of Risk of Bias in Included Studies

260 One review author will assess the risk of bias in each included study using specific risk of  
261 bias tools for prevalence and incidence studies. Another investigator will independently  
262 verify the information.[34] Any conflicts will be resolved by discussion or by adjudication by  
263 a third investigator. We will provide tool guides *a priori* for consistent and transparent use  
264 of each tool among investigators.

265 For prevalence studies, we will use the tool proposed by Hoy et al.[35] Items 1 to 4 of the  
266 tool assess the external validity of the study (items 1 and 2 assess sampling bias, and items 3  
267 and 4 assess non-response bias). For item 1, we will address the extent to which the study  
268 population represents the general US population with respect to factors that influence  
269 prevalence and incidence of dry eye. Items 5 to 10 assess internal validity (items 5 to 9  
270 assess ascertainment bias, and item 10 assesses bias related to the analysis). The study is  
271 rated as “high” or “low” risk of bias for each of the 10 items; there is no ‘unclear’ option.  
272 Once all 10 items are rated, we will evaluate the overall risk of bias in the summary  
273 assessment. The summary assessment is a subjective judgement and is not calculated as an  
274 overall sum of the items. There are three options for the summary assessment: ‘high’,  
275 ‘moderate’, and ‘low’ risk of bias.

276 For incidence studies, we will use the Joanna Briggs Institute Critical Appraisal Checklist for  
277 Cohort Studies.[36] The checklist has 11 items, and each item has ‘yes’, ‘no’, ‘unclear’, and  
278 ‘not applicable’ options. There is an additional overall appraisal item with ‘include’, ‘exclude’  
279 and ‘seek further info’ options, and a comment section for the ‘reason of exclusion’. We will  
280 not exclude studies from the systematic review based on the ‘exclude’ response in the  
281 overall appraisal item, but we will interpret this response as ‘high risk of bias’. We will  
282 consider excluding studies from meta-analysis based on an ‘exclude’ response in the overall  
283 appraisal item (i.e., high risk of bias).

## 284 Data Synthesis

285 We will summarize from each study, sample characteristics and prevalence and incidence  
286 data with precision estimates, in structured tables.[37] We will also present all reported  
287 potential risk factors for dry eye including their definitions (e.g., age grouping) and effect  
288 estimates for each potential risk factor, including specific risk factors such as geo-

1  
2  
3 289 environmental factors and screen time when data is available. We will document prevalence  
4  
5 290 and incidence of dry eye severity using previously defined classifications when reported in  
6  
7 291 the primary studies.[38,39] All data will be stratified by case definition whenever feasible.  
8

### 9 292 Investigation of Heterogeneity

10  
11 293 We will qualitatively investigate sources of heterogeneity of the data by assessing risk of  
12  
13 294 bias and other aspects of the design of each study (methodological heterogeneity) and  
14  
15 295 examining the characteristics of the populations (clinical heterogeneity) in each study,  
16  
17 296 including age, sex, case definition, and sociodemographic profiles. We will display the  
18  
19 297 estimates and their uncertainty from each study in forest plots (separately for prevalence  
20  
21 298 and incidence). We will quantitatively assess statistical heterogeneity by calculating the  
22  
23 299 amount of heterogeneity ( $\tau^2$ ) and the contribution of heterogeneity to the total variability  
24  
25 300 across studies ( $I^2$ ).[40]

### 26 301 Meta-Analyses

27  
28  
29 302 When appropriate, we will conduct meta-analyses of prevalence and incidence estimates.  
30  
31 303 We will combine data if the study estimates have acceptable heterogeneity, both  
32  
33 304 qualitatively and quantitatively. If a study uses more than one case definition and reports  
34  
35 305 several prevalence and incidence estimates, we will stratify the estimates by case definition  
36  
37 306 and analyze them in separate subgroup meta-analyses. We will use our clinical expertise and  
38  
39 307 the literature to judge which case definitions are compatible for pooling in subgroup meta-  
40  
41 308 analyses. We will also consider stratifying meta-analyses by levels of risk of bias. We will  
42  
43 309 consider meta-analysis of measures of association for common risk factor covariates across  
44  
45 310 studies. Whether or not we conduct meta-analyses, we will qualitatively summarize the  
46  
47 311 findings across studies in a summary of findings table.

48 312 We will meta-analyse prevalence and cumulative incidence proportions using separate  
49  
50 313 random-intercept regression models with a logistic link function via the exact likelihood  
51  
52 314 method. We will combine incidence rate using a random-intercept regression model. Both  
53  
54 315 models and can be fitted in the Generalized Linear Mixed Model (GLMM) modules available  
55  
56 316 in many popular statistical packages such as SAS, R, and Stata.[41]  
57  
58  
59  
60

1  
2  
3 317 Meta-regression  
4

5 318 If there are sufficient risk factor data within-sample (i.e., from the primary studies) and out-  
6  
7 319 of-sample (e.g., from census-derived demographic data, governmental agency derived geo-  
8  
9 320 environmental data), we will consider conducting a Bayesian meta-regression with  
10  
11 321 integrative systems modelling using DisMod-MR software.[42] This will allow us to  
12  
13 322 extrapolate nationwide prevalence and incidence estimates captured in the primary studies  
14  
15 323 and stratify prevalence and incidence by factors such as age, sex, US region and geo-  
16  
17 324 environmental factors.[42–44] Integrative systems modelling potentially addresses some of  
18  
19 325 the notable challenges faced in this meta-analysis including, (1) diverse case-definitions, (2)  
20  
21 326 variation in environmental and climatic exposures within the country, and (3) a lack of  
22  
23 327 standardised age stratification), which may improve compatibility for pooling of data. We  
24  
25 328 will consult with statisticians and integrative systems modelling experts to decide on the  
26  
27 329 most appropriate statistical approach.

28 330 **DISCUSSION**

29  
30 331 Dry eye disease is a chronic symptomatic condition that is costly to society, reduces quality  
31  
32 332 of life and is among the leading reasons for presentation to eye care services worldwide. For  
33  
34 333 this reason, the World Health Organization has emphasized that dry eye must not be  
35  
36 334 overlooked when addressing global eye care needs.[45] With demographic ageing,[46]  
37  
38 335 lifestyle changes,[24] climate changes,[2,15,22] and the introduction of newer and more  
39  
40 336 costly therapies,[13] dry eye-related economic costs to the US society can be expected to  
41  
42 337 increase considerably. Hence, contemporaneous burden of disease estimates are necessary  
43  
44 338 to enable health policymakers and research funding bodies make decisions regarding public  
45  
46 339 health interventions and adequate resource allocation.

47 340 Our systematic review and meta-analysis will overcome some of the limitations in previous  
48  
49 341 reviews of dry eye epidemiology reports as we will use contemporaneous data and  
50  
51 342 comprehensive methods to enhance transparency and reproducibility. However, we do  
52  
53 343 anticipate challenges and limitations in our study. An important limitation will be the  
54  
55 344 anticipated high levels of heterogeneity in prevalence and incidence estimates. But this will  
56  
57 345 provide the opportunity to explore and report the reasons for heterogeneity such as clinical  
58  
59 346 and methodological variations. Another limitation is that we will search only published  
60  
347 literature and we acknowledge the potential of publication bias. Despite potential

1  
2  
3 348 limitations, the information gathered from this study is likely to be widely used in the United  
4  
5 349 States and in comparable settings by patients, physicians, health policymakers, researchers,  
6  
7 350 and custodians to obtain and allocate funds and other resources to target the prevention  
8  
9 351 and treatment of dry eye.

10  
11 352 **ETHICS AND DISSEMINATION**

12  
13 353 This review does not require the approval of an Ethics Committee because it will use  
14  
15 354 previously published studies. We will publish our results in a peer-reviewed journal and  
16  
17 355 present at relevant conferences.  
18  
19  
20  
21  
22  
23  
24  
25  
26  
27  
28  
29  
30  
31  
32  
33  
34  
35  
36  
37  
38  
39  
40  
41  
42  
43  
44  
45  
46  
47  
48  
49  
50  
51  
52  
53  
54  
55  
56  
57  
58  
59  
60

For peer review only

1  
2  
3 356 **AUTHOR STATEMENT:**  
4

5 357 Paul McCann: Concept, design, drafting, final submission  
6

7  
8 358 Alison Abraham: Statistical and methodological design, drafting  
9

10 359 Darren Gregory: Design, drafting  
11

12 360 Scott Hauswirth: Design, drafting  
13

14 361 Cristos Ifantides: Design, drafting  
15

16 362 Su-Hsun Liu: Methodological design, drafting  
17

18 363 Ian J. Saldanha: Methodological design, drafting, final submission  
19

20 364 Tianjing Li: Concept, design, drafting, final submission, guarantor  
21

22 365 **CONFLICTS OF INTEREST:** None to declare.  
23

24 366 **FUNDING:** This work was supported by National Eye Institute, National Institutes of Health,  
25  
26 367 grant number UG1EY020522. The funding body had no role in developing the protocol.  
27  
28  
29

30 368  
31

32 369  
33  
34  
35  
36  
37  
38  
39  
40  
41  
42  
43  
44  
45  
46  
47  
48  
49  
50  
51  
52  
53  
54  
55  
56  
57  
58  
59  
60

## 370 REFERENCES

- 371 1 Craig JP, Nichols KK, Akpek EK, *et al.* TFOS DEWS II Definition and Classification  
372 Report. *Ocul Surf* 2017;**15**:276–83. doi:<https://doi.org/10.1016/j.jtos.2017.05.008>
- 373 2 Farrand KF, Fridman M, Stillman IÖ, *et al.* Prevalence of Diagnosed Dry Eye Disease in  
374 the United States Among Adults Aged 18 Years and Older. *Am J Ophthalmol*  
375 2017;**182**:90–8. doi:10.1016/j.ajo.2017.06.033
- 376 3 Schiffman RM, Walt JG, Jacobsen G, *et al.* Utility assessment among patients with dry  
377 eye disease. *Ophthalmology* 2003;**110**:1412–9. doi:10.1016/S0161-6420(03)00462-7
- 378 4 Miljanović B, Dana R, Sullivan DA, *et al.* Impact of Dry Eye Syndrome on Vision-  
379 Related Quality of Life. *Am J Ophthalmol* 2007;**143**:409-415.e2.  
380 doi:<https://doi.org/10.1016/j.ajo.2006.11.060>
- 381 5 Galor A, Feuer W, Lee DJ, *et al.* Depression, Post-traumatic Stress Disorder, and Dry  
382 Eye Syndrome: A Study Utilizing the National United States Veterans Affairs  
383 Administrative Database. *Am J Ophthalmol* 2012;**154**:340-346.e2.  
384 doi:10.1016/j.ajo.2012.02.009
- 385 6 Yu J, Asche C V, Fairchild CJ. The Economic Burden of Dry Eye Disease in the United  
386 States: A Decision Tree Analysis. *Cornea* 2011;**30**.
- 387 7 Nichols KK, Bacharach J, Holland E, *et al.* Impact of Dry Eye Disease on Work  
388 Productivity, and Patients' Satisfaction With Over-the-Counter Dry Eye Treatments.  
389 *Invest Ophthalmol Vis Sci* 2016;**57**:2975–82. doi:10.1167/iovs.16-19419
- 390 8 Mertzanis P, Abetz L, Rajagopalan K, *et al.* The Relative Burden of Dry Eye in Patients'  
391 Lives: Comparisons to a U.S. Normative Sample. *Invest Ophthalmol Vis Sci*  
392 2005;**46**:46–50. doi:10.1167/iovs.03-0915
- 393 9 Reddy P, Grad O, Rajagopalan K. The Economic Burden of Dry Eye: A Conceptual  
394 Framework and Preliminary Assessment. *Cornea* 2004;**23**.
- 395 10 McDonald M, Patel DA, Keith MS, *et al.* Economic and Humanistic Burden of Dry Eye  
396 Disease in Europe, North America, and Asia: A Systematic Literature Review. *Ocul Surf*  
397 2016;**14**:144–67. doi:<https://doi.org/10.1016/j.jtos.2015.11.002>
- 398 11 Mulcahy AW, Whaley CM, Gizaw M, *et al.* *International Prescription Drug Price*



- 1  
2  
3 399 *Comparisons: Current Empirical Estimates and Comparisons with Previous Studies.*  
4  
5 400 RAND Corporation PP - Santa Monica, CA 2021. doi:10.7249/RR2956  
6  
7 401 12 Chen EM, Kombo N, Teng CC, *et al.* Ophthalmic Medication Expenditures and Out-of-  
8  
9 402 Pocket Spending: An Analysis of United States Prescriptions from 2007 through 2016.  
10  
11 403 *Ophthalmology* 2020;**127**:1292–302.  
12  
13 404 doi:https://doi.org/10.1016/j.ophtha.2020.04.037  
14  
15 405 13 Holland EJ, Luchs J, Karpecki PM, *et al.* Lifitegrast for the Treatment of Dry Eye  
16  
17 406 Disease: Results of a Phase III, Randomized, Double-Masked, Placebo-Controlled Trial  
18  
19 407 (OPUS-3). *Ophthalmology* 2017;**124**:53–60. doi:10.1016/j.ophtha.2016.09.025  
20  
21 408 14 Pan Q, Angelina A, Marrone M, *et al.* Autologous serum eye drops for dry eye.  
22  
23 409 *Cochrane Database Syst Rev* Published Online First: 2017.  
24  
25 410 doi:10.1002/14651858.CD009327.pub3  
26  
27 411 15 Schaumberg DA, Sullivan DA, Buring JE, *et al.* Prevalence of dry eye syndrome among  
28  
29 412 US women. *Am J Ophthalmol* 2003;**136**:318–26. doi:10.1016/S0002-9394(03)00218-6  
30  
31 413 16 Shimmura S, Shimazaki J, Tsubota K. Results of a Population-Based Questionnaire on  
32  
33 414 the Symptoms and Lifestyles Associated with Dry Eye. *Cornea* 1999;**18**.  
34  
35 415 17 Stapleton F, Alves M, Bunya VY, *et al.* TFOS DEWS II Epidemiology Report. *Ocul Surf*  
36  
37 416 2017;**15**:334–65. doi:https://doi.org/10.1016/j.jtos.2017.05.003  
38  
39 417 18 Wolfs RCW, Borger PH, Ramrattan RS, *et al.* Changing Views on Open-Angle  
40  
41 418 Glaucoma : Definitions and Prevalences — The Rotterdam Study. *Investig Ophthalmol*  
42  
43 419 *Vis Sci* 2000;**41**:3309–3321.  
44  
45 420 19 Paulsen AJ, Cruickshanks KJ, Fischer ME, *et al.* Dry Eye in the Beaver Dam Offspring  
46  
47 421 Study: Prevalence, Risk Factors, and Health-Related Quality of Life. *Am J Ophthalmol*  
48  
49 422 2014;**157**:799–806. doi:10.1016/j.ajo.2013.12.023  
50  
51 423 20 Uchino M, Dogru M, Uchino Y, *et al.* Japan Ministry of Health Study on Prevalence of  
52  
53 424 Dry Eye Disease Among Japanese High School Students. *Am J Ophthalmol*  
54  
55 425 2008;**146**:925-929.e2. doi:10.1016/j.ajo.2008.06.030  
56  
57 426 21 Tan LL, Morgan P, Cai ZQ, *et al.* Prevalence of and risk factors for symptomatic dry eye  
58  
59 427 disease in Singapore. *Clin Exp Optom* 2015;**98**:45–53. doi:10.1111/cxo.12210  
60

- 1  
2  
3 428 22 Galor A, Kumar N, Feuer W, *et al.* Environmental Factors Affect the Risk of Dry Eye  
4 429 Syndrome in a United States Veteran Population. *Ophthalmology* 2014;**121**:972-  
5 430 973.e1. doi:10.1016/j.opthta.2013.11.036  
6  
7  
8  
9 431 23 Dana R, Bradley JL, Guerin A, *et al.* Estimated Prevalence and Incidence of Dry Eye  
10 432 Disease Based on Coding Analysis of a Large, All-age United States Health Care  
11 433 System. *Am J Ophthalmol* 2019;**202**:47–54. doi:10.1016/j.ajo.2019.01.026  
12  
13  
14  
15 434 24 Courtin R, Pereira B, Naughton G, *et al.* Prevalence of dry eye disease in visual display  
16 435 terminal workers: a systematic review and meta-analysis. *BMJ Open* 2016;**6**:e009675.  
17 436 doi:10.1136/bmjopen-2015-009675  
18  
19  
20  
21 437 25 Liu N, Liu L, Li J, *et al.* Prevalence of and Risk Factors for Dry Eye Symptom in  
22 438 Mainland China: A Systematic Review and Meta-Analysis. *J Ophthalmol*  
23 439 2014;**2014**:748654. doi:10.1155/2014/748654  
24  
25  
26  
27 440 26 Aromataris E, Munn Z. *JBIM Manual for Evidence Synthesis*. JBI 2020.  
28 441 doi:10.46658/JBIMES-20-01  
29  
30  
31 442 27 Higgins J, Thomas J, Chandler J, *et al.* *Cochrane Handbook for Systematic Reviews of*  
32 443 *Interventions version 6.2 (updated February 2021)*. Cochrane 2021.  
33  
34  
35  
36 444 28 Stroup DF, Berlin JA, Morton SC, *et al.* Meta-analysis of observational studies in  
37 445 epidemiology: a proposal for reporting. Meta-analysis of Observational Studies in  
38 446 Epidemiology (MOOSE) group. *JAMA* 2000;**283**:2008–201.  
39  
40  
41  
42 447 29 Stevens GA, Alkema L, Black RE, *et al.* Guidelines for Accurate and Transparent Health  
43 448 Estimates Reporting: the GATHER statement. *Lancet* 2016;**388**:e19–23.  
44 449 doi:10.1016/S0140-6736(16)30388-9  
45  
46  
47  
48 450 30 Migliavaca CB, Stein C, Colpani V, *et al.* Quality assessment of prevalence studies: a  
49 451 systematic review. *J Clin Epidemiol* 2020;**127**:59–68.  
50 452 doi:10.1016/j.jclinepi.2020.06.039  
51  
52  
53  
54 453 31 Munn Z, Moola S, Lisy K, *et al.* Methodological guidance for systematic reviews of  
55 454 observational epidemiological studies reporting prevalence and cumulative incidence  
56 455 data. *JBI Evid Implement* 2015;**13**.  
57  
58  
59 456 32 Lemeshow S, Hosmer Jr DW, Klar J, *et al.* *Adequacy of Sample Size in Health Studies*.

- 1  
2  
3 457 World Health Organization 1990.  
4  
5  
6 458 33 Veritas Health Innovation Melbourne Australia. Covidence systematic review  
7  
8 459 software.  
9  
10 460 34 Jian-Yu E, Saldanha IJ, Canner J, *et al.* Adjudication rather than experience of data  
11  
12 461 abstraction matters more in reducing errors in abstracting data in systematic reviews.  
13  
14 462 *Res Synth Methods* 2020;**11**:354–62. doi:<https://doi.org/10.1002/jrsm.1396>  
15  
16 463 35 Hoy D, Brooks P, Woolf A, *et al.* Assessing risk of bias in prevalence studies:  
17  
18 464 modification of an existing tool and evidence of interrater agreement. *J Clin Epidemiol*  
19  
20 465 2012;**65**:934–9. doi:10.1016/j.jclinepi.2011.11.014  
21  
22 466 36 Moola S, Munn Z, Tufanaru C, *et al.* Chapter 7: Systematic reviews of etiology and  
23  
24 467 risk. In: Aromataris E, Munn Z, eds. *Joanna Briggs Institute Reviewer's Manual*. The  
25  
26 468 Joanna Briggs Institute 2017.  
27  
28 469 37 McKenzie JE, Brennan SE. Synthesizing and presenting findings using other methods.  
29  
30 470 In: Higgins J, Thomas J, Chandler J, *et al.*, eds. *Cochrane Handbook for Systematic*  
31  
32 471 *Reviews of Interventions version 6.2 (updated February 2021)*. Cochrane 2021.  
33  
34 472 38 The Definition and Classification of Dry Eye Disease: Report of the Definition and  
35  
36 473 Classification Subcommittee of the International Dry Eye Workshop (2007). *Ocul Surf*  
37  
38 474 2007;**5**:75–92. doi:[https://doi.org/10.1016/S1542-0124\(12\)70081-2](https://doi.org/10.1016/S1542-0124(12)70081-2)  
39  
40 475 39 Wolffsohn JS, Arita R, Chalmers R, *et al.* TFOS DEWS II Diagnostic Methodology report.  
41  
42 476 *Ocul Surf* 2017;**15**:539–74. doi:<https://doi.org/10.1016/j.jtos.2017.05.001>  
43  
44 477 40 Rücker G, Schwarzer G, Carpenter JR, *et al.* Undue reliance on I2 in assessing  
45  
46 478 heterogeneity may mislead. *BMC Med Res Methodol* 2008;**8**:79. doi:10.1186/1471-  
47  
48 479 2288-8-79  
49  
50 480 41 Stijnen T, Schmid CH, Law M, *et al.* Exact Likelihood Methods for Group-Based  
51  
52 481 Summaries. In: Schmid CH, Stijnen T, White IR, eds. *Handbook of Meta-Analysis*. CRC  
53  
54 482 Press 2021. 65–89.  
55  
56 483 42 Flaxman AD, Vos T, Murray CJ. *An Integrative Meta-regression Framework for*  
57  
58 484 *Descriptive Epidemiology*. University of Washington Press 2015.  
59  
60 485 43 Flaxman AD, Wittenborn JS, Robalik T, *et al.* Prevalence of Visual Acuity Loss or

- 1  
2  
3 486 Blindness in the US: A Bayesian Meta-analysis. *JAMA Ophthalmol* Published Online  
4  
5 487 First: 13 May 2021. doi:10.1001/jamaophthalmol.2021.0527  
6  
7 488 44 Bourne R, Steinmetz JD, Flaxman S, *et al.* Trends in prevalence of blindness and  
8  
9 489 distance and near vision impairment over 30 years: an analysis for the Global Burden  
10  
11 490 of Disease Study. *Lancet Glob Heal* 2021;**9**:e130–43. doi:10.1016/S2214-  
12  
13 491 109X(20)30425-3  
14  
15 492 45 World Health Organization. World report on vision. Geneva: World Health  
16  
17 493 Organization: 2019.  
18  
19 494 46 Christensen K, Doblhammer G, Rau R, *et al.* Ageing populations: the challenges ahead.  
20  
21 495 *Lancet* 2009;**374**:1196–208. doi:10.1016/S0140-6736(09)61460-4  
22  
23 496  
24  
25 497  
26  
27  
28  
29  
30  
31  
32  
33  
34  
35  
36  
37  
38  
39  
40  
41  
42  
43  
44  
45  
46  
47  
48  
49  
50  
51  
52  
53  
54  
55  
56  
57  
58  
59  
60

1  
2  
3 498 **DATA STATEMENT:** Data will be made available upon reasonable request.  
4

5 499 **ACKNOWLEDGEMENTS:** We would like to acknowledge the contribution of Kristen Desanto,  
6  
7 500 our information specialist, who assisted us with developing the search strategy for  
8  
9 501 electronic databases. We would also like to acknowledge and thank Dr Abraham Flaxman  
10  
11 502 (University of Washington) for reviewing and consulting on our proposed meta-regression  
12  
13 503 methods.  
14  
15  
16  
17  
18  
19  
20  
21  
22  
23  
24  
25  
26  
27  
28  
29  
30  
31  
32  
33  
34  
35  
36  
37  
38  
39  
40  
41  
42  
43  
44  
45  
46  
47  
48  
49  
50  
51  
52  
53  
54  
55  
56  
57  
58  
59  
60

For peer review only

## 1 Supplementary File 1

2

3 **PRISMA-P (Preferred Reporting Items for Systematic review and Meta-Analysis**  
 4 **Protocols) 2015 checklist: recommended items to address in a systematic review**  
 5 **protocol\***

| Section and topic                 | Item No | Checklist item                                                                                                                                                                                                                |            | Page   |
|-----------------------------------|---------|-------------------------------------------------------------------------------------------------------------------------------------------------------------------------------------------------------------------------------|------------|--------|
| <b>ADMINISTRATIVE INFORMATION</b> |         |                                                                                                                                                                                                                               |            |        |
| Title:                            |         |                                                                                                                                                                                                                               |            |        |
| Identification                    | 1a      | Identify the report as a protocol of a systematic review                                                                                                                                                                      | ✓          | 1      |
| Update                            | 1b      | If the protocol is for an update of a previous systematic review, identify as such                                                                                                                                            | n/a        | n/a    |
| Registration                      | 2       | If registered, provide the name of the registry (such as PROSPERO) and registration number                                                                                                                                    | ✓          | 3      |
| Authors:                          |         |                                                                                                                                                                                                                               |            |        |
| Contact                           | 3a      | Provide name, institutional affiliation, e-mail address of all protocol authors; provide physical mailing address of corresponding author                                                                                     | ✓          | 1-2    |
| Contributions                     | 3b      | Describe contributions of protocol authors and identify the guarantor of the review                                                                                                                                           | ✓          | 15     |
| Amendments                        | 4       | If the protocol represents an amendment of a previously completed or published protocol, identify as such and list changes; otherwise, state plan for documenting important protocol amendments                               | n/a        | n/a    |
| Support:                          |         |                                                                                                                                                                                                                               |            |        |
| Sources                           | 5a      | Indicate sources of financial or other support for the review                                                                                                                                                                 | ✓          | 15     |
| Sponsor                           | 5b      | Provide name for the review funder and/or sponsor                                                                                                                                                                             | ✓          | 15     |
| Role of sponsor or funder         | 5c      | Describe roles of funder(s), sponsor(s), and/or institution(s), if any, in developing the protocol                                                                                                                            | ✓          | 15     |
| <b>INTRODUCTION</b>               |         |                                                                                                                                                                                                                               |            |        |
| Rationale                         | 6       | Describe the rationale for the review in the context of what is already known                                                                                                                                                 | ✓          | 5-6    |
| Objectives                        | 7       | Provide an explicit statement of the question(s) the review will address with reference to participants, interventions, comparators, and outcomes (PICO)                                                                      | ✓<br>(PCC) | 7-8    |
| <b>METHODS</b>                    |         |                                                                                                                                                                                                                               |            |        |
| Eligibility criteria              | 8       | Specify the study characteristics (such as PICO, study design, setting, time frame) and report characteristics (such as years considered, language, publication status) to be used as criteria for eligibility for the review | ✓          | 3, 7-8 |
| Information sources               | 9       | Describe all intended information sources (such as electronic databases, contact with study authors, trial registers or other grey literature sources) with planned dates of coverage                                         | ✓          | 9      |
| Search strategy                   | 10      | Present draft of search strategy to be used for at least one electronic database, including planned limits, such that it could be repeated                                                                                    | ✓          | Suppl  |
| Study records:                    |         |                                                                                                                                                                                                                               |            |        |
| Data management                   | 11a     | Describe the mechanism(s) that will be used to manage records and data throughout the review                                                                                                                                  | ✓          | 9-10   |

|                                    |     |                                                                                                                                                                                                                                                  |     |        |
|------------------------------------|-----|--------------------------------------------------------------------------------------------------------------------------------------------------------------------------------------------------------------------------------------------------|-----|--------|
| Selection process                  | 11b | State the process that will be used for selecting studies (such as two independent reviewers) through each phase of the review (that is, screening, eligibility and inclusion in meta-analysis)                                                  | ✓   | 9-10   |
| Data collection process            | 11c | Describe planned method of extracting data from reports (such as piloting forms, done independently, in duplicate), any processes for obtaining and confirming data from investigators                                                           | ✓   | 10     |
| Data items                         | 12  | List and define all variables for which data will be sought (such as PICO items, funding sources), any pre-planned data assumptions and simplifications                                                                                          | ✓   | 10     |
| Outcomes and prioritization        | 13  | List and define all outcomes for which data will be sought, including prioritization of main and additional outcomes, with rationale                                                                                                             | ✓   | 10     |
| Risk of bias in individual studies | 14  | Describe anticipated methods for assessing risk of bias of individual studies, including whether this will be done at the outcome or study level, or both; state how this information will be used in data synthesis                             | ✓   | 11     |
| Data synthesis                     | 15a | Describe criteria under which study data will be quantitatively synthesised                                                                                                                                                                      | ✓   | 12     |
|                                    | 15b | If data are appropriate for quantitative synthesis, describe planned summary measures, methods of handling data and methods of combining data from studies, including any planned exploration of consistency (such as $I^2$ , Kendall's $\tau$ ) | ✓   | 12     |
|                                    | 15c | Describe any proposed additional analyses (such as sensitivity or subgroup analyses, meta-regression)                                                                                                                                            | ✓   | 12, 13 |
|                                    | 15d | If quantitative synthesis is not appropriate, describe the type of summary planned                                                                                                                                                               | ✓   | 11-12  |
| Meta-bias(es)                      | 16  | Specify any planned assessment of meta-bias(es) (such as publication bias across studies, selective reporting within studies)                                                                                                                    | ✓   | 13     |
| Confidence in cumulative evidence  | 17  | Describe how the strength of the body of evidence will be assessed (such as GRADE)                                                                                                                                                               | n/a | n/a    |

**\* It is strongly recommended that this checklist be read in conjunction with the PRISMA-P Explanation and Elaboration (cite when available) for important clarification on the items. Amendments to a review protocol should be tracked and dated. The copyright for PRISMA-P (including checklist) is held by the PRISMA-P Group and is distributed under a Creative Commons Attribution Licence 4.0.**

## Supplementary File 2

## Search strategy draft

**MEDLINE (via Ovid MEDLINE® ALL)**

- 1 exp Dry Eye Syndromes/
- 2 exp Keratoconjunctivitis Sicca/
- 3 exp Xerophthalmia/
- 4 exp Meibomian Glands/
- 5 (dry\* adj3 eye\*).tw,kf.
- 6 ((keratoconjunctivitis or kerato-conjunctivitis) adj1 sicca).tw,kf.
- 7 xerophthalmi\*.tw,kf.
- 8 meibomian gland dysfunction.tw,kf.
- 9 exp Sjogren's Syndrome/
- 10 ((Sjogren\* or Sjoegren\*) adj1 (syndrom\* or disease\*)).tw,kf.
- 11 (9 or 10) and (exp Eye/ or eye\*.mp. or ocular\*.mp. or ophthalm\*.mp.)
- 12 or/1-8,11
- 13 exp Epidemiology/
- 14 exp Epidemiologic Methods/
- 15 epidemiology.fs.
- 16 burden of disease.tw,kf.
- 17 DALY\*.tw,kf.
- 18 death rate\*.tw,kf.
- 19 Disability Adjusted Life Years.tw,kf.
- 20 disease burden.tw,kf.
- 21 endemic\*.tw,kf.
- 22 epidemic\*.tw,kf.
- 23 epidemiolog\*.tw,kf.
- 24 frequency.tw,kf.
- 25 incidence\*.tw,kf.
- 26 morbidities.tw,kf.
- 27 morbidity.tw,kf.
- 28 occurrence.tw,kf.
- 29 outbreak\*.tw,kf.
- 30 prevalence.tw,kf.
- 31 surveillance.tw,kf.
- 32 survival rate\*.tw,kf.
- 33 years lived with disability.tw,kf.
- 34 years of life lost.tw,kf.



1  
2  
3 35 YLD\*.tw,kf.  
4 36 YLL\*.tw,kf.  
5  
6 37 or/13-36  
7 38 12 and 37  
8  
9 39 38 NOT (exp animals/ NOT exp humans/)  
10 40 limit 39 to yr="2010 -Current"  
11

### Embase (via Elsevier)

12  
13 #1 'dry eye'/exp  
14 #2 'dry eye syndrome'/exp  
15 #3 'evaporative dry eye disease'/exp  
16 #4 'keratoconjunctivitis sicca'/exp  
17 #5 'xerophthalmia'/exp  
18 #6 'meibomian gland'/exp  
19 #7 (dry\* NEAR/3 eye\*):ab,ti,kw  
20 #8 ((keratoconjunctivitis or kerato-conjunctivitis) NEAR/1 sicca):ab,ti,kw  
21 #9 xerophthalmi\*:ab,ti,kw  
22 #10 'meibomian gland dysfunction':ab,ti,kw  
23 #11 'Sjogren syndrome'/exp  
24 #12 ((Sjogren\* or Sjogren\*) NEAR/1 (syndrom\* or disease\*)):ab,ti,kw  
25 #13 (#11 OR #12) AND ('eye'/exp OR eye\* OR ocular\* OR ophthalm\*)  
26 #14 #1 OR #2 OR #3 OR #4 OR #5 OR #6 OR #7 OR #8 OR #9 OR #10 OR #13  
27 #15 'epidemiology'/exp  
28 #16 epidemiology:lnk  
29 #17 'burden of disease':ab,ti,kw  
30 #18 DALY\*:ab,ti,kw  
31 #19 'death rate\*':ab,ti,kw  
32 #20 'Disability Adjusted Life Years':ab,ti,kw  
33 #21 'disease burden':ab,ti,kw  
34 #22 endemic\*:ab,ti,kw  
35 #23 epidemic\*:ab,ti,kw  
36 #24 epidemiolog\*:ab,ti,kw  
37 #25 frequency:ab,ti,kw  
38 #26 incidence\*:ab,ti,kw  
39 #27 morbidities:ab,ti,kw  
40 #28 morbidity:ab,ti,kw  
41 #29 occurrence:ab,ti,kw  
42 #30 outbreak\*:ab,ti,kw  
43 #31 prevalence:ab,ti,kw  
44  
45  
46  
47  
48  
49  
50  
51  
52  
53  
54  
55  
56  
57  
58  
59  
60

- 1  
2  
3 #32 surveillance:ab,ti,kw  
4 #33 'survival rate\*':ab,ti,kw  
5 #34 'years lived with disability':ab,ti,kw  
6 #35 'years of life lost':ab,ti,kw  
7 #36 YLD\*:ab,ti,kw  
8 #37 YLL\*:ab,ti,kw  
9  
10 #38 #15 OR #16 OR #17 OR #18 OR #19 OR #20 OR #21 OR #22 OR #23 OR #24 OR #25 OR  
11 #26 OR #27 OR #28 OR #29 OR #30 OR #31 OR #32 OR #33 OR #34 OR #35 OR #36 OR #37  
12 #39 #14 AND #38  
13 #40 #39 NOT ([animals]/lim NOT [humans]/lim)  
14 #41 #40 AND [2010-2021]/py  
15  
16  
17  
18  
19  
20  
21  
22  
23  
24  
25  
26  
27  
28  
29  
30  
31  
32  
33  
34  
35  
36  
37  
38  
39  
40  
41  
42  
43  
44  
45  
46  
47  
48  
49  
50  
51  
52  
53  
54  
55  
56  
57  
58  
59  
60

1  
2  
3  
4  
5  
6  
7  
8  
9  
10  
11  
12  
13  
14  
15  
16  
17  
18  
19  
20  
21  
22  
23  
24  
25  
26  
27  
28  
29  
30  
31  
32  
33  
34  
35  
36  
37  
38  
39  
40  
41  
42  
43  
44  
45  
46  
47  
48  
49  
50  
51  
52  
53  
54  
55  
56  
57  
58  
59  
60

For peer review only
