# Supplementary material for: Prevalence and incidence of dry eye in the USA: a systematic review protocol
Source: PubMed Central journal article supplement — BMJ Open. 2021 Nov 23;11(11):e056203. doi: 10.1136/bmjopen-2021-056203 (PMC8611449; doi:10.1136/bmjopen-2021-056203), 2021-11-23
Supplement: bmjopen-2021-056203supp002.pdf [file bmjopen-2021-056203supp002.pdf]

## Supplementary File 2

## Search strategy draft

**MEDLINE (via Ovid MEDLINE® ALL)**

- 1 exp Dry Eye Syndromes/
- 2 exp Keratoconjunctivitis Sicca/
- 3 exp Xerophthalmia/
- 4 exp Meibomian Glands/
- 5 (dry\* adj3 eye\*).tw,kf.
- 6 ((keratoconjunctivitis or kerato-conjunctivitis) adj1 sicca).tw,kf.
- 7 xerophthalmi\*.tw,kf.
- 8 meibomian gland dysfunction.tw,kf.
- 9 exp Sjogren's Syndrome/
- 10 ((Sjogren\* or Sjoegren\*) adj1 (syndrom\* or disease\*)).tw,kf.
- 11 (9 or 10) and (exp Eye/ or eye\*.mp. or ocular\*.mp. or ophthalm\*.mp.)
- 12 or/1-8,11
- 13 exp Epidemiology/
- 14 exp Epidemiologic Methods/
- 15 epidemiology.fs.
- 16 burden of disease.tw,kf.
- 17 DALY\*.tw,kf.
- 18 death rate\*.tw,kf.
- 19 Disability Adjusted Life Years.tw,kf.
- 20 disease burden.tw,kf.
- 21 endemic\*.tw,kf.
- 22 epidemic\*.tw,kf.
- 23 epidemiolog\*.tw,kf.
- 24 frequency.tw,kf.
- 25 incidence\*.tw,kf.
- 26 morbidities.tw,kf.
- 27 morbidity.tw,kf.
- 28 occurrence.tw,kf.
- 29 outbreak\*.tw,kf.
- 30 prevalence.tw,kf.
- 31 surveillance.tw,kf.
- 32 survival rate\*.tw,kf.
- 33 years lived with disability.tw,kf.
- 34 years of life lost.tw,kf.

35 YLD\*.tw,kf.  
36 YLL\*.tw,kf.  
37 or/13-36  
38 12 and 37  
39 38 NOT (exp animals/ NOT exp humans/)  
40 limit 39 to yr="2010 -Current"

**Embase (via Elsevier)**

#1 'dry eye'/exp  
#2 'dry eye syndrome'/exp  
#3 'evaporative dry eye disease'/exp  
#4 'keratoconjunctivitis sicca'/exp  
#5 'xerophthalmia'/exp  
#6 'meibomian gland'/exp  
#7 (dry\* NEAR/3 eye\*):ab,ti,kw  
#8 ((keratoconjunctivitis or kerato-conjunctivitis) NEAR/1 sicca):ab,ti,kw  
#9 xerophthalmi\*:ab,ti,kw  
#10 'meibomian gland dysfunction':ab,ti,kw  
#11 'Sjogren syndrome'/exp  
#12 ((Sjogren\* or Sjogren\*) NEAR/1 (syndrom\* or disease\*)):ab,ti,kw  
#13 (#11 OR #12) AND ('eye'/exp OR eye\* OR ocular\* OR ophthalm\*)  
#14 #1 OR #2 OR #3 OR #4 OR #5 OR #6 OR #7 OR #8 OR #9 OR #10 OR #13  
#15 'epidemiology'/exp  
#16 epidemiology:lnk  
#17 'burden of disease':ab,ti,kw  
#18 DALY\*:ab,ti,kw  
#19 'death rate\*':ab,ti,kw  
#20 'Disability Adjusted Life Years':ab,ti,kw  
#21 'disease burden':ab,ti,kw  
#22 endemic\*:ab,ti,kw  
#23 epidemic\*:ab,ti,kw  
#24 epidemiolog\*:ab,ti,kw  
#25 frequency:ab,ti,kw  
#26 incidence\*:ab,ti,kw  
#27 morbidities:ab,ti,kw  
#28 morbidity:ab,ti,kw  
#29 occurrence:ab,ti,kw  
#30 outbreak\*:ab,ti,kw  
#31 prevalence:ab,ti,kw

- #32 surveillance:ab,ti,kw
- #33 'survival rate\*':ab,ti,kw
- #34 'years lived with disability':ab,ti,kw
- #35 'years of life lost':ab,ti,kw
- #36 YLD\*:ab,ti,kw
- #37 YLL\*:ab,ti,kw
- #38 #15 OR #16 OR #17 OR #18 OR #19 OR #20 OR #21 OR #22 OR #23 OR #24 OR #25 OR  
#26 OR #27 OR #28 OR #29 OR #30 OR #31 OR #32 OR #33 OR #34 OR #35 OR #36 OR #37
- #39 #14 AND #38
- #40 #39 NOT ([animals]/lim NOT [humans]/lim)
- #41 #40 AND [2010-2021]/py
